# Supplementary material
Source: publisher figshare collection journal article supplement (https://gsapubs.figshare.com/articles/dataset/_/21397176)
Supplement: Supplementary file 1 [file 1]

## Sheet: Sheet1
Table S1. Emplacement ages of carbonatite from worldwide occurrences (n=594).
ID Number (This study)	ID Number (W&K, 2008)	Long	Lat	Age (W&K, 2008 )	Age for distribution	Age (This study)	Age Error	Method(Target)	Method(System)	Method(Rock type)	Method(Technique)	Locality	Country	Continent	Age Reference	Note	Average age in Woolley's dataset	Average age in this study
1	1	3.233	23.617	1994	1994	1994	+22/-17	Zircon	U-Pb	Carbonatite	-	In'Ouzzal	Algeria	Africa	Woolley and Kjarsgaard, 2008
2	2	14.183	-11.2									Cuacra	Angola	Africa	None
3	3	14.433	-11.683	92	0.65	0.65	0.15	Apatite	(U-Th-Sm)/He	Aillikite lavas	-	Catanda	Angola	Africa	Giuliani, A., Campeny, M., Kamenetsky, V. S., Afonso, J. C., Maas, R., Melgarejo, J. C., ... & Manuel, J. (2017). Southwestern Africa on the burner: Pleistocene carbonatite volcanism linked to deep mantle upwelling in Angola. Geology, 45(11), 971-974.
4	4	16.25	-11.9									Capuia	Angola	Africa	None
5	5	15.95	-12.15									Bailundo	Angola	Africa	None
6	6	15.033	-12.183	119								Monte Verde	Angola	Africa	①Woolley and Kjarsgaard, 2008; ②Issa Filho, A. B. R. M. D., Dos Santos, A. B. R. M. D., Riffel, B. F., Lapido-Loureiro, F. E. V., & McReath, I. (1991). Aspects of the geology, petrology and chemistry of some Angolan carbonatites. Journal of Geochemical Exploration, 40(1-3), 205-226.	Pers. commun., no detail	Average
7	7	15.267	-12.517									Coola	Angola	Africa	None
8	8	15.783	-12.683									Chianga	Angola	Africa	None
9	9	15.217	-12.917									Longonjo	Angola	Africa	None
10	10	13.967	-14.267									Bonga	Angola	Africa	None
11	11	13.883	-14.317	133	130.8	130.8	1.4	Feldspar and mica	Rb-Sr	-	-	Tchivira	Angola	Africa	①Woolley and Kjarsgaard, 2008; ②Allsopp, H. L., Bristow, J. W., Logan, C. T., Eales, H. V., & Erlank, A. J. (1984). Rb-Sr geochronology of three Karoo-related intrusive complexes.		Average
12	12	16.183	-14.217									Capunda	Angola	Africa	None
13	13	12.933	-16.3									Virulundo	Virulundo	Africa	None
14	14	11.8	-16.917									Monte Vermelho	Angola	Africa	None
15	15	13.667	-17.183									Lupongola	Angola	Africa	None
16	16	29.55	-2.867	583	705.5	705.5	4.5	Zircon	U–Pb	Carbonatite	LA–ICP–MS	Matongo-Bandaga	Burundi	Africa	①Midende, G., Boulvais, P., Tack, L., Melcher, F., Gerdes, A., Dewaele, S., Demaiﬀe, D., Decrée, S., 2014. Petrography, geochemistry and U-Pb zircon age of the Matongo carbonatite Massif (Burundi): implication for the Neoproterozoic geodynamic evolution of Central Africa. J. Afr. Earth Sci. 100, 656–674.②Decrée, S., Demaiffe, D., Tack, L., Nimpagaritse, G., De Paepe, P., Boulvais, P., & Debaille,…
17	17	29.533	0.85									Monbadio	Congo (D.R.)	Africa	None
18	18	29.283	0.6									Bingo	Congo (D.R.)	Africa	None
19	19	29.15	-0.983	822	822	822	120	Whole rock	Rb-Sr	-	-	Lueshe	Congo (D.R.)	Africa	Woolley and Kjarsgaard, 2008
20	20	29.3	-1.083	803	803	803	22	Whole rock	Rb-Sr	-	-	Kirumba	Congo (D.R.)	Africa	Woolley and Kjarsgaard, 2008
21	21	34.333	28.2		605	605	13	Zircon	U-Pb	Albitite	SIMS	Tarr Complex	Egypt	Africa	Azer, M. K., Stern, R. J., & Kimura, J. I. (2010). Origin of a Late Neoproterozoic (605±13 Ma) intrusive carbonate–albitite complex in Southern Sinai, Egypt. International Journal of Earth Sciences, 99(2), 245-267.
22	22	34.65	28.133	87	87	87		Whole rock	Rb-Sr; K-Ar	syenite	-	El Kahfa	Egypt	Africa	①Woolley and Kjarsgaard, 2008; ②Hashad, A. H., AH, H., & EL REEDY, M. W. M. (1979). Geochronology of the anorogenic alkalic rocks South Eastern Desert, Egypt.			Average
23	23	33.633	23.733									Tarbtie - South	Egypt	Africa	None
24	24	34.95	22.85	137.5	137.5	137.5		Whole rock, Titanite	K-Ar, fission-track	Nepheline syenite and gabbro	-	Nigrub el Fogani	Egypt	Africa	①Woolley and Kjarsgaard, 2008; ②Omar, G. I., Kohn, B. P., Lutz, T. M., & Faul, H. (1987). The cooling history of Silurian to Cretaceous alkaline ring complexes, south Eastern Desert, Egypt, as revealed by fission-track analysis. Earth and planetary science letters, 83(1-4), 94-108.		Average	Average
25	25	34.467	22.7	146	146	146		Whole rock, -	K-Ar, Rb-Sr	Nepheline syenite, -	-	El Naga	Egypt	Africa	Woolley and Kjarsgaard, 2008		Average	Average
26	26	33.617	22.05	131.6	131.6	131.6	10	Whole rock	Rb-Sr	Quartz syenite	-	Mansouri	Egypt	Africa	Woolley and Kjarsgaard, 2008
27	27	10.583	-0.75	600	600	600	13	Phlogopite	K-Ar	Carbonatite	-	Mabounie	Gabon	Africa	Woolley and Kjarsgaard, 2008
28	28	13.3	0.133	2143	2143	2143	-	-	-	-	-	N,Goutou	Gabon	Africa	Woolley and Kjarsgaard, 2008
29	29	34.15	-0.567	28	28	38-17.5		Pyroxene and biotite	K-Ar	Silicate rock	-	Kisingiri and Rangwa	Kenya	Africa	Woolley and Kjarsgaard, 2008		Average	Average
30	30	34.383	-0.483	14.3	14.3	16.5-12.1		Biotite	K-Ar	Sövite	-	Wasaki Peninsula	Kenya	Africa	Woolley and Kjarsgaard, 2008		Average	Average
31	31	34.4	-0.483	14.5	14.5	18.3-10.6		Whole rock	K-Ar	Phonolite	-	Nyamaji	Kenya	Africa	Woolley and Kjarsgaard, 2008		Average	Average
32	32	34.367	-0.55	7.5	7.5	11-4.1		Whole rock, nepheline and biotite	K-Ar	-	-	North and South Ruri	Kenya	Africa	Woolley and Kjarsgaard, 2008		Average	Average
33	33	34.5	-0.383	6.6	6.6	12-1.3		Whole rock and biotite	K-Ar	-	-	Homa Mountain	Kenya	Africa	Woolley and Kjarsgaard, 2008		Average	Average
34	34	35.167	-0.183		22	22		-	-	-	-	Buru Hill	Kenya	Africa	Onuonga, I. O. , & Bowden, P. . (2000). Hot-spring and supergene lanthanide mineralization at the buru carbonatite centre, western kenya. Mineralogical Magazine, 64(4), 663-673.
35	35	35.333	-0.067	12.6	12.6	19.9-5.5		Whole rock and biotite	K-Ar	-	-	Tinderet and Londiani	Kenya	Africa	Woolley and Kjarsgaard, 2008		Average	Average
36	36	36.1	-2.15	2	2	2	0.05	Whole rock and biotite	K-Ar	Phonolitic nephelinite	-	Shombole	Kenya	Africa	①Woolley and Kjarsgaard, 2008; ②Fairhead, J. D., Mitchell, J. G., & Williams, L. A. J. (1972). New K/Ar determinations on rift volcanics of S. Kenya and their bearing on age of rift faulting. Nature Physical Science, 238(83), 66-69.		Average	Average
37	37	39.25	-4.467									Mrima	Kenya	Africa	None
38	38	23.667	22.25	27.6	27.6	27.6		Whole rock	K-Ar	Nephelinite and basanite	-	Unnamed	Libya	Africa	Woolley and Kjarsgaard, 2008		Average	Average
39	39	34.917	-15.117	123	123	123	6	Phlogopite	K-Ar	Carbonatite	-	Kangankunde	Malawi	Africa	Woolley and Kjarsgaard, 2008
40	40	35.067	-15.083									Nailuwe	Malawi	Africa	None
41	41	35.133	-15.167									Utale	Malawi	Africa	None
42	42	34.917	-15.267									Palula	Malawi	Africa	None
43	43	34.917	-15.283									Kapiri area	Malawi	Africa	None
44	44	34.95	-15.317									Kanono	Malawi	Africa	None
45	45	34.717	-15.417									Nsengwa	Malawi	Africa	None
46	46	35.6	-15.283									Python Island	Malawi	Africa	None
47	47	35.6	-15.333	130.9	130.9	130.9		Biotite, titanite and zircon	K-Ar, fission-track	Sövite, nepheline syenite	-	Chilwa Island	Malawi	Africa	Woolley and Kjarsgaard, 2008		Average	Average
48	48	35.8	-15.533	133	133	133	7	Biotite	K-Ar	Sövite	-	Tundulu	Malawi	Africa	Woolley and Kjarsgaard, 2008
49	49	35.75	-15.6									Nkalonje	Malawi	Africa	None
50	50	35.667	-15.667									Bangala	Malawi	Africa	None
51	51	35.8	-15.7		132.9	132.9	6.7	Zircon	U-Pb	carbonatite	LA-MC-ICP-MS	Mauze and Songwe	Malawi	Africa	Broom-Fendley, S. , Brady, A. E. , Horstwood, M. S. A. , Woolley, A. , Mtegha, J. , & Wall, F. , et al. (2017). Geology, geochemistry and geochronology of the songwe hill carbonatite, malawi. Journal of African Earth Sciences, 134.
52	52	35.583	-15.817									Namangali	Malawi	Africa	None
53	53	0	20.5	262	262	262		Whole rock, whole rock	U-Pb, Rb-Sr	-	-	Adrar Tadhak	Mali	Africa	Woolley and Kjarsgaard, 2008		Average	Average
54	54	0.083	20.217									Tekawelt	Mali	Africa	None
55	55	0.067	20.183									Adiounedj	Mali	Africa	None
56	56	0.1	20.15									In Imanal	Mali	Africa	None
57	57	0.05	20.067									Anezrouf	Mali	Africa	None
58	58	0.1	20.067									In Amadial	Mali	Africa	None
59	59	-11.367	21.067	85	99	99	5	Apatite	Fission-track	Carbonatite	-	Richat Dome	Mauritania	Africa	①Poupeau, G., Fabre, J., Labrin, E., Azdimoussa, A., Netto, A. M., and Monod, T., 1996. Nouvelles datations par traces de fission de la structure circulaire des Richat (Mauritanie). Mém. Serv. Géol. Alg. 8, 231-236；②Netto, A. M., Fabre, J., Poupeau, G., and Champemmois, M., 1992. Datations par traces de la structure circulaire des Richats. C. R. Acad. Sci. 314, 1179-1186.
60	60	-14.533	19.783									Tabrinkout	Mauritania	Africa	None
61	61	-14.6	19.717									Akjoujt	Mauritania	Africa	None
62	62	-14.617	19.667									Legleitat	Mauritania	Africa	None
63	63	3.1	34.417	57	57	57	3	Biotite	K-Ar	Aiounite	-	Taourirt area	Morocco	Africa	Woolley and Kjarsgaard, 2008	Wagner, C., Mokhtari, A., Deloule, E., Chabaux, F., 2003. Carbonatite and alkaline magmatism in Taourirt (Morocco): petrological, geochemical and Sr-Nd isotope characteristics. Journal of Petrology, 44(5): 937-965.
64	64	-4.65	32.567	43	39	39	2	Feldspar	K-Ar	Nephelinitic dykes	-	Tamazert	Morocco	Africa	①Klein, J. L. & Harmand, C. (1985). Le volcanisme de la re¤gion Zebzate: a“ge et relations avec le complexe alcalin a' carbonatites du Tamazert (Haut Atlas de Midelt, Maroc). In: 110e'me Congre's National des Socie¤te¤s Savantes. Montpellier Sci. Fascicule VI, 147^152. ②Bouabdellah M, Hoernle K, Kchit A, et al. Petrogenesis of the Eocene Tamazert continental carbonatites (Central High Atlas, Moro…
65	65	36.183	-12.383									Luicuisse	Mozambique	Africa	None
66	66	36.317	-12.75									Unnamed	Mozambique	Africa	None
67	67	36.183	-14.233									Unnamed	Mozambique	Africa	None
68	68	31.267	-15.533									Cone Negose	Mozambique	Africa	None
69	69	30.45	-15.4									Lualadzi	Mozambique	Africa	None
70	70	34.133	-16.2									Chandava	Mozambique	Africa	None
71	71	34.1	-16.2									Buzimuana	Mozambique	Africa	None
72	72	34.083	-16.317									Muambe	Mozambique	Africa	None
73	73	34.067	-19.25									Xiluvo, Cura and Nharuchonga	Mozambique	Africa	None
74	74	13.767	-17.3									Kakumangua	Namibia	Africa	None
75	75	13.817	-17.333	749	1130	1140-1120		Pyrochlore	U-Pb	Carbonatite	-	Swartbooisdrif	Namibia	Africa	①Druppel, K. , Wagner, T. , & Boyce, A. J. . (2006). Evolution of sulfide mineralization in ferrocarbonatite, swartbooisdrif, northwestern namibia: constraints from mineral compositions and sulfur isotopes. The Canadian Mineralogist.②Simon, S. J. , Wei, C. , Ellmies, R. , Yang, H. , & Tamehe, L. S. . (2017). New sims u-pb age on zircon from the epembe carbonatite dyke, nw namibia: implications fo…	written commun
76	76	13.5	-17.55		1184	1184	10	Zircon	U-Pb	Sovite	SIMS	Epembe	Namibia	Africa	Simon S J, Wei C, Ellmies R, et al. New SIMS U-Pb age on zircon from the Epembe carbonatite dyke, NW Namibia: Implications for Mesoproterozoic evolution of carbonatites at the southern margin of the Congo Craton[J]. Journal of African Earth Sciences, 2017, 135: 108-114.
77	77	12.083	-18.45									Agate Mountain	Namibia	Africa	None
78	78	16.767	-20.033	126.6	126.6	126.6	7.3	Mineral	Rb-Sr	-	-	Okorusu	Namibia	Africa	Woolley and Kjarsgaard, 2008
79	79	16.25	-20.767									Ondurakorume	Namibia	Africa	None
80	80	16.117	-20.8	163.2	163.2	172.8-153.6		Biotite	K-Ar	Sövite	-	Kalkfeld	Namibia	Africa	Woolley and Kjarsgaard, 2008		Average	Average
81	81	16.017	-20.883									Osongombo	Namibia	Africa	None
82	82	14.75	-20.35	746	765	765	16	Xenotime-(Y)	U-Pb	Carbonatite	LA-ICP-MS	Oas and Lofdal	Namibia	Africa	Wall F, Niku-Paavola V N, Storey C, et al. Xenotime-(Y) from carbonatite dykes at Lofdal, Namibia: unusually low LREE: HREE ratio in carbonatite, and the first dating of xenotime overgrowths on zircon[J]. The Canadian Mineralogist, 2008, 46(4): 861-877.
83	83	15.25	-20.767									Kwaggaspan	Namibia	Africa	None
84	84	14.183	-21.383	134	134	150-125.5		Whole rock and mineral, biotite, mineral	Rb-Sr, Ar-Ar, Rb-Sr	Gabbro	-	Messum	Namibia	Africa	①Woolley and Kjarsgaard, 2008; ②Milner, S. C., Le Roex, A. P., & O'CONNOR, J. M. (1995). Age of Mesozoic igneous rocks in northwesternNamibia, and their relationship to continental breakup. Journal of the Geological Society, 152(1), 97-104.		Average	Average
85	85	15.317	-21.967	500	548	548	4	Monazite	U-Pb	Carbonatite	LA-Q-ICP-MS	Eureka	Namibia	Africa	Gonçalves, G. O., Lana, C., Scholz, R., Buick, I. S., Gerdes, A., Kamo, S. L., ... & Oliveira, L. C. A. (2018). The Diamantina monazite: a new low‐Th reference material for microanalysis. Geostandards and Geoanalytical Research, 42(1), 25-47.
86	86	17.1	-21.917		837	837	60/-49	Titanite	U-Pb	Clinopyroxenites	TIMS	Otjisazu	Namibia	Africa	B. Bühn, Drr, W. , & Brauns, C. M. . (2001). Petrology and age of the otjisazu carbonatite complex, namibia: implications for the pre-and synorogenic damaran evolution. Journal of African Earth ences, 32(1), 1-17.
87	87	17.8	-25.15									Gibeon	Namibia	Africa	None
88	88	17.833	-25.867	72.5	77	77	2	Phlogopite	K-Ar	peridotite at Blue Hills	-	Gross Brukkaros	Namibia	Africa	①Woolley and Kjarsgaard, 2008; ②Reid, D. L., Cooper, A. F., Rex, D. C., & Harmer, R. E. (1990). Timing of post–Karoo alkaline volcanism in southern Namibia. Geological Magazine, 127(5), 427-433.		Average
89	89	16.017	-26.467	48.9	48.9	48.9		Biotite, biotite	K-Ar, Rb-Sr	Sövite, sövite	-	Dicker Willem	Namibia	Africa	①Woolley and Kjarsgaard, 2008; ②Reid, D. L., Cooper, A. F., Rex, D. C., & Harmer, R. E. (1990). Timing of post–Karoo alkaline volcanism in southern Namibia. Geological Magazine, 127(5), 427-433.		Average	Average
90	90	15.883	-26.583									Keishohe	Namibia	Africa	None
91	91	15.783	-26.85									Teufelskuppe	Namibia	Africa	None
92	92	15.567	-26.9									Kaukausib	Namibia	Africa	None
93	93	15.717	-27.933	37	37	37		Whole rock	K-Ar	Phonolite	-	Chamais	Namibia	Africa	Woolley and Kjarsgaard, 2008
94	94	16.267	-28.333									Karingarab	Namibia	Africa	None
95	95	17.417	-28.167	514	514	514	26	Whole rock	Rb-Sr	-	-	Grootpenseiland（Marinkas Kwela）	Namibia	Africa	Woolley and Kjarsgaard, 2008
96	96	18	-28.083									Grunau	Namibia	Africa	None
97	97	18.517	-27.583									Mickberg	Namibia	Africa	None
98	98	18.683	-27.667									Weltevrede	Namibia	Africa	None
99	99	18.833	-27.55	491	491	491	8	Whole rock and biotite	Rb-Sr	-	-	Garub	Namibia	Africa	Woolley and Kjarsgaard, 2008
100	100	19.667	-28.5									Bokiesbank	Namibia	Africa	None
101	101	43.267	10.4									Darkainle	Somalia	Africa	None
102	102	30.283	-23.25	2059	2051	2051	6	zircon	U-Pb	syenite	LA-MC-ICP-MS	Schiel	South Africa	Africa	Laurent, O., & Zeh, A. (2015). A linear Hf isotope-age array despite different granitoid sources and complex Archean geodynamics: example from the Pietersburg block (South Africa). Earth and Planetary Science Letters, 430, 326-338.
103	103	31.133	-24	2012	2060	2060	2	Baddeleyite	U-Pb	Carbonatite	SIMS	Phalaborwa	South Africa	Africa	Wu, F. Y., Yang, Y. H., Li, Q. L., Mitchell, R. H., Dawson, J. B., Brandl, G., & Yuhara, M. (2011). In situ determination of U–Pb ages and Sr–Nd–Hf isotopic constraints on the petrogenesis of the Phalaborwa carbonatite Complex, South Africa. Lithos, 127(1-2), 309-322.
104	104	29.95	-24.85									Magnet Heights	South Africa	Africa	None
105	105	29.817	-24.967	1341	1341	1341	37	Whole rock and biotite	Rb-Sr	Ijolite and nepheline syenite	-	Spitskop	South Africa	Africa	Woolley and Kjarsgaard, 2008
106	106	27.167	-23.867	1000	1000	1000	200	Monazite	Pb-Pb	-	-	Glenover	South Africa	Africa	Woolley and Kjarsgaard, 2008
107	107	26.2	-25.133		1190	1190	80	Whole Rock	Sm-Nd	Carbonatite	-	Goudini	South Africa	Africa	Nelson D R, Chivas A R, Chappell B W, et al. Geochemical and isotopic systematics in carbonatites and implications for the evolution of ocean-island sources[J]. Geochimica et Cosmochimica Acta, 1988, 52(1): 1-17.
108	108	27.5	-25.05									Nooitgedacht	South Africa	Africa	None
109	109	27.5	-25.117		1246	1246	26	-	Sm-Nd	-	-	Kruidfontein	South Africa	Africa	①Harmer, 1~. E. 1992. The geochemistry of Spitskop and related alkaline Complexes. Ph.D. dissertation 332p. University Cape Town, South Africa. ② Horstmann, U.E., Verwoerd, W.J., 1997. Carbon and oxygen isotope variations in southern African carbonatites. Journal of African Earth Sciences 25, 115–136. ③Veevers J J, Saeed A. Central Antarctic provenance of Permian sandstones in Dronning Maud Land …
110	110	27.467	-25.317									Bulhoekkop and Bulhoek South	South Africa	Africa	None
111	111	27.433	-25.433									Welgevonden	South Africa	Africa	None
112	112	28.083	-25.417									Pretoria Saltpan	South Africa	Africa	None
113	113	28.433	-25.417	1200	1139.8	1139.8	4.8	Perovskite	U-Pb	co-occurred kimberlite	SIMS	Premier Mine/ Cullinan Diamond Mine(renamed)	South Africa	Africa	①Dongre, A. , & Tappe, S. . (2019). Kimberlite and carbonatite dykes within the premier diatreme root (cullinan diamond mine, south africa): new insights to mineralogical-genetic classifications and magma co2 degassing. Lithos. ②Tappe, S. , Dongre, A. , Liu, C. Z. , & Wu, F. Y. . (2018). 'premier' evidence for prolonged kimberlite pipe formation and its influence on diamond transport from deep ea…
114	114	28.383	-25.6									Roodeplaat	South Africa	Africa	None
115	115	28.283	-25.683									Derdepoort	South Africa	Africa	None
116	116	27.517	-27.283									Tweerivier	South Africa	Africa	None
117	117	26.883	-28.4	1357	1354	1354	11	Phlogopite and carbonate	Rb-Sr	Carbonatite	-	Stukpan	South Africa	Africa	①Woolley and Kjarsgaard, 2008; ②Verwoerd, WJ,* Weder, EEW** & Harmer, R. (1993). The Stukpan carbonatite in the Orange Free State Goldfield. South African journal of geology, 96(3), 108-118.		Average
118	118	31.433	-28.75	900	900	900		Biotite	K-Ar	-	-	Bull's Run	South Africa	Africa	Woolley and Kjarsgaard, 2008
119	119	29.083	-30.5	63.4	63.4	63.4		Zircon	-	-	-	Melkfontein	South Africa	Africa	Woolley and Kjarsgaard, 2008
120	120	24.833	-28.85									Benfontein	South Africa	Africa	None
121	121	22.8	-29.883	1930	1930	1930		-	Sm-Nd	-	-	Keikamspoort	South Africa	Africa	Woolley and Kjarsgaard, 2008
122	122	17.95	-30.883									Sandkopsdrif	South Africa	Africa	None
123	123	20.85	-32.483	74.6	74.6	76.8-72.5		Biotite	K-Ar	Melilite basalt	-	Saltpetrekop	South Africa	Africa	①Woolley and Kjarsgaard, 2008; ②Duncan, R. A., Hargraves, R. B., & Brey, G. P. (1978). Age, palaeomagnetism and chemistry of melilite basalts in the Southern Cape, South Africa. Geological Magazine, 115(5), 317-327.		Average	Average
124	124	30.8	12.483	559	550	550	87	Whole rock	Rb-Sr	Ditroite and fluorite vein		Jebel Dumbeir	Sudan	Africa	①Woolley and Kjarsgaard, 2008; ②Harris, N. B. W., Mohammed, A. E. R. O., & Shaddad, M. Z. (1983). Geochemistry and petrogenesis of a nepheline syenite-carbonatite complex from the Sudan. Geological Magazine, 120(2), 115-127.		Average
125	125	35.85	-2.567	1.28	4.057	4.057	0.06	Lava	Ar-Ar	Nephelinite	-	Mosonik	Tanzania	Africa	①Muirhead, J. D., Kattenhorn, S. A., Lee, H., Mana, S., Turrin, B. D., Fischer, T. P., ... & Stamps, D. S. (2016). Evolution of upper crustal faulting assisted by magmatic volatile release during early-stage continental rift development in the East African Rift. Geosphere, 12(6), 1670-1700. ②Zaitsev, A. N. , Mchenry, L. , Savchenok, A. I. , Strekopytov, S. , Spratt, J. , & Humphreys-Williams, E. …
126	126	35.917	-2.767	0	0	0		-	-	-	-	Oldoinyo Lengai	Tanzania	Africa	Woolley and Kjarsgaard, 2008
127	127	35.95	-2.867	0.5	1.2	1.2		-	-	-	-	Kerimasi	Tanzania	Africa	Amsellem, E., Moynier, F., Bertrand, H., Bouyon, A., Mata, J., Tappe, S., & Day, J. M. (2020). Calcium isotopic evidence for the mantle sources of carbonatites. Science advances, 6(23), eaba3269.
128	128	35.417	-3.183	3.91	4.33	4.63-4.02	0.05/0.02	Minerals rich in K	Ar-Ar	volcanic centers (foidite and phonolite)	-	Sadiman	Tanzania	Africa	Deino, A.L., 2011. 40Ar/39Ar dating of Laetoli, Tanzania. In: Harrison, T. (Ed.), Paleontology and Geology of Laetoli: Human Evolution in Context. Volume 1: Geology, Geochronology, Paleoecology and Paleoenvironment. Springer, Dordrecht, pp. 77–97.
129	129	35.717	-3.417									Oldoinyo Dili	Tanzania	Africa	None
130	130	36.6	-3.367	2.12	2.12	2.12		Whole rock	K-Ar	Olivine basalt	-	Monduli-Arusha tuff cones	Tanzania	Africa	Woolley and Kjarsgaard, 2008		Average	Average
131	131	35.667	-3.633									Endabash	Tanzania	Africa	None
132	132	35.817	-4.217	1.1	1.1	1.1		Whole rock	K-Ar	Nephelinite	-	Kwahera(Kwaraha)	Tanzania	Africa	Woolley and Kjarsgaard, 2008		Average	Average
133	133	35.083	-4.367									Basotu	Tanzania	Africa	None
134	134	35.4	-4.433	1.2	1.2	1.2		Whole rock	K-Ar	Nephelinite	-	Hanang and Balangida	Tanzania	Africa	Woolley and Kjarsgaard, 2008		Average	Average
135	135	37.567	-7.433									Wigu Hill	Tanzania	Africa	None
136	136	37.6	-7.5									Maji Ya Weta	Tanzania	Africa	None
137	137	38.067	-7.833									Luhombero	Tanzania	Africa	None
138	138	30.517	-6.8		719	719	38	Mineral separators (galena, quartz, red carbonatite)	206Pb-207Pb	-	-	Sangu-Ikola	Tanzania	Africa	Stendal, H. et al., 2004. Gold potential of the Mpanda Mineral Field, SW Tanzania: evaluation based on geological, lead isotopic and aeromagnetic data. Journal of African Earth Sciences, 38(5): 437-447.
139	139	32.833	-7.7	1040	1040	1040	40	Biotite	K-Ar	-	-	Ngualla	Tanzania	Africa	Woolley and Kjarsgaard, 2008
140	140	33.267	-8.85		100	100	10	Feldspar	K-Ar	-	-	Songwe	Tanzania	Africa	Boniface, N. (2017). Crystal chemistry of pyrochlore from the Mesozoic Panda Hill carbonatite deposit, western Tanzania. Journal of African Earth Sciences, 126, 33-44.
141	141	33.183	-8.967									Sengeri Hill	Tanzania	Africa	None
142	142	33.233	-9		113	113	6	Mica	K-Ar	-	-	Panda Hill	Tanzania	Africa	Boniface, N. (2017). Crystal chemistry of pyrochlore from the Mesozoic Panda Hill carbonatite deposit, western Tanzania. Journal of African Earth Sciences, 126, 33-44.
143	143	33.367	-8.917		118	118	9	Phlogoite	K-Ar	-	-	Mbalizi	Tanzania	Africa	Boniface, N. (2017). Crystal chemistry of pyrochlore from the Mesozoic Panda Hill carbonatite deposit, western Tanzania. Journal of African Earth Sciences, 126, 33-44.
144	144	33.2	-9.5		655	655		Zircon	U-Pb	-	-	Nachendezwaya	Tanzania	Africa	Boniface, N. (2017). Crystal chemistry of pyrochlore from the Mesozoic Panda Hill carbonatite deposit, western Tanzania. Journal of African Earth Sciences, 126, 33-44.
145	145	34.517	-10.05									Makonde	Tanzania	Africa	None
146	146	30.25	0.683	0	0	0		-	14C	-	-	Fort Portal and Kasekere	Uganda	Africa	Woolley and Kjarsgaard, 2008
147	147	29.883	0.1									Katwe-Kikorongo	Uganda	Africa	None
148	148	30.083	-0.233	0.45	0.45	0.45	0.15	Whole rock	K-Ar	Mafurite	-	Bunyaruguru	Uganda	Africa	Woolley and Kjarsgaard, 2008
149	149	34.2	2.833	15.5	15.5	15.5	0.5	Whole rock	K-Ar	Analcime phonolite	-	Toror	Uganda	Africa	Woolley and Kjarsgaard, 2008
150	150	34.1	2.833									Theno	Uganda	Africa	None
151	151	34.283	2.15	22.1	22.1	32.3-5		Whole rock, nepheline	K-Ar, K-Ar	Nephelinite and melanephelinite, -	-	Napak	Uganda	Africa	Woolley and Kjarsgaard, 2008		Average	Average
152	152	34.45	1.75									Lolekek	Uganda	Africa	None
153	153	34.367	1.167									Budeda	Uganda	Africa	None
154	154	34.35	1.033									Sekululu	Uganda	Africa	None
155	155	34.283	0.867	32.5	25	25	2.5	-	K-Ar	-	-	Bukusu	Uganda	Africa	Woolley and Kjarsgaard, 2008
156	156	34.183	0.683	40	40	40		-	Nd-Sr	-	-	Tororo	Uganda	Africa	Woolley and Kjarsgaard, 2008
157	157	34.15	0.65		40	40		-	-	-	-	Sukulu	Uganda	Africa	Bell, K., & Blenkinsop, J. (1987). Nd and Sr isotopic compositions of East African carbonatites: implications for mantle heterogeneity. Geology, 15(2), 99-102.
158	158	32.85	-10.167	679	679	679	25	Phlogopite	K-Ar	Carbonatite	-	Nkombwa	Zambia	Africa	Woolley and Kjarsgaard, 2008
159	159	30.017	-15.183	106.5	106.5	113-101		Phlogopite and amphibole	K-Ar	Sövite	-	Kaluwe	Zambia	Africa	Woolley and Kjarsgaard, 2008		Average	Average
160	160	30.1	-15.217									Nachomba	Zambia	Africa	None
161	161	30.183	-15.333									Mwambuto	Zambia	Africa	None
162	162	30.283	-15.35									Chasweta	Zambia	Africa	None
163	163	28.583	-15.55									Mkwisi	Zambia	Africa	None
164	164	28.45	-15.883									Keshya	Zambia	Africa	None
165	165	28.967	-16.267									Marindagomo	Zimbabwe	Africa	None
166	166	30.35	-16.333									Dande-Doma	Zimbabwe	Africa	None
167	167	32.15	-16.467									Kapfrugwa	Zimbabwe	Africa	None
168	168	26.867	-18.15	89	89	89	3	Phlogopite	K-Ar	-	-	Katete	Zimbabwe	Africa	Woolley and Kjarsgaard, 2008
169	169	31.75	-19.067									Dorowa	Zimbabwe	Africa	None
170	170	31.717	-19.2	209	209	209	16	Biotite	Rb-Sr	Ijolite	-	Shawa	Zimbabwe	Africa	Woolley and Kjarsgaard, 2008
171	171	32.3	-19.75	127	127	127	4	Biotite	K-Ar	-	-	Chishanya	Zimbabwe	Africa	Woolley and Kjarsgaard, 2008
172	172	-127.5	58.7									Kechika area	Canada	America North	None
173	173	-123.75	56.45	344	344	344		Mica	K-Ar			Aley	Canada	America North	Woolley and Kjarsgaard, 2008		Average	Average
174	174	-124.5	55.667		365	365	16	Zircon	Pb-Pb	Carbonatite	-	Lonnie	Canada	America North	Pell J (1994) Carbonatites, nepheline syenites, kimberlites and related rocks in British Columbia. In: Bulletin—Ministry of Energy,Mines and Petroleum Resources, Report, vol 88. British Columbia Ministry of Energy, Mines and Petroleum Resources,
175	175	-124.417	55.717	340	357	357	17	Zircon	U-Pb	Biotite-apatite sövite	ID-TIMS	Vergil	Canada	America North	Rukhlov, A. S., & Bell, K. (2010). Geochronology of carbonatites from the Canadian and Baltic Shields, and the Canadian Cordillera: clues to mantle evolution. Mineralogy and Petrology, 98(1-4), 11-54.
176	176	-122.067	54.517									Wicheeda Lake	Canada	America North	None
177	177	-118.883	52.383	202	202	202		Phlogopite	K-Ar	-	-	Howard Creek	Canada	America North	Woolley and Kjarsgaard, 2008		Average	Average
178	178	-119.1	52.4	351								Paradise Lake	Canada	America North	Woolley and Kjarsgaard, 2008	Pers. Commun	Average
179	179	-119.15	52.4	325	357	357	17	Zircon	U-Pb	Pyrochlore-amphibole-apatite beforsite	ID-TIMS	Verity	Canada	America North	Rukhlov, A. S., & Bell, K. (2010). Geochronology of carbonatites from the Canadian and Baltic Shields, and the Canadian Cordillera: clues to mantle evolution. Mineralogy and Petrology, 98(1-4), 11-54.
180	180	-119.15	52.283									Bone Creek	Canada	America North	None
181	181	-119.183	52.133	328	328	328	30	Zircon	U-Pb	Beforsite	-	Mud Lake	Canada	America North	Woolley and Kjarsgaard, 2008
182	182	-118.807	51.592		359.3	359.3	2	Zircon	U-Pb	Carbonatite	LA-ICP-MS	Mount Grace	Canada	America North	Millonig, L. J., Gerdes, A., & Groat, L. A. (2012). U–Th–Pb geochronology of meta-carbonatites and meta-alkaline rocks in the southern Canadian Cordillera: a geodynamic perspective. Lithos, 152, 202-217.
183	183	-118.61	51.298		813	813	27	Titanite and apatite	U-Th-Pb	Carbonatite and fenlite	-	Perry River	Canada	America North	Millonig, L. J., Gerdes, A., & Groat, L. A. (2012). U–Th–Pb geochronology of meta-carbonatites and meta-alkaline rocks in the southern Canadian Cordillera: a geodynamic perspective. Lithos, 152, 202-217.	Unpublished data
184	184	-118.4	50.933									Three Valley Gap	Canada	America North	None
185	185	-116.5	51.5	356.5	356.5	356.5	1	Peroverskite	U-Pb	Ijolite	-	Ice River	Canada	America North	Heaman, L. M. (2009). The application of U–Pb geochronology to mafic, ultramafic and alkaline rocks: an evaluation of three mineral standards. Chemical Geology, 261(1-2), 43-52.
186	186	-115.917	63.55	1785	1785	1785		Biotite	K-Ar	-	-	Bigspruce Lake	Canada	America North	Woolley and Kjarsgaard, 2008
187	187	-113.967	63.283	2592	2592	2592	3.3/-2.9	Titanite	U-Pb	Carbonatite	-	Leith Lake	Canada	America North	Woolley and Kjarsgaard, 2008
188	188	-111	67.75	2595	2595	2595	2	Monazite	U-Pb	Carbonatite	-	Grays Bay	Canada	America North	Woolley and Kjarsgaard, 2008
189	189	-94.667	62.583	2686	2686	2686		-	Rb-Sr	-	-	Kaminak Lake	Canada	America North	Woolley and Kjarsgaard, 2008
190	190	-109.167	59.833									Nisikkatch Lake	Canada	America North	None
191	191	-100.15	56.65		1800	1800	24	Garnet	U-Pb	Carbonatite	ID-TIMS	Eden Lake	Canada	America North	Ekaterina, B., Salnikova, Anton, R., & Chakhmouradian, et al. (2019). Calcic garnets as a geochronological and petrogenetic tool applicable to a wide variety of rocks. Lithos, 338–339, 141-154.
192	192	-92	54.8	1824	1865	1865	22	Zircon	U-Pb	Sövite	ID-TIMS	Carb Lake	Canada	America North	Rukhlov, A. S., & Bell, K. (2010). Geochronology of carbonatites from the Canadian and Baltic Shields, and the Canadian Cordillera: clues to mantle evolution. Mineralogy and Petrology, 98(1-4), 11-54.
193	193	-89.917	52.917	1005	1093	1093	1.7	Baddeleyite	U-Pb	Silicocarbonatite	ID-TIMS	Big Beaver House	Canada	America North	Rukhlov, A. S., & Bell, K. (2010). Geochronology of carbonatites from the Canadian and Baltic Shields, and the Canadian Cordillera: clues to mantle evolution. Mineralogy and Petrology, 98(1-4), 11-54.
194	194	-89.6	52.617	1145	1083	1083	1.2	Baddeleyite	U-Pb	Sövite	ID-TIMS	Schryburt Lake	Canada	America North	Rukhlov, A. S., & Bell, K. (2010). Geochronology of carbonatites from the Canadian and Baltic Shields, and the Canadian Cordillera: clues to mantle evolution. Mineralogy and Petrology, 98(1-4), 11-54.
195	195	-92.283	51.367	2566	2566	2566		Galena	U-Pb	Quartz-carbonate	-	Springpole Lake	Canada	America North	Woolley and Kjarsgaard, 2008
196	196	-84.833	51.083									Albany Forks	Canada	America North	None
197	197	-81.017	50.75	1635	1769	1769	23	Zircon	Pb-Pb	Sövite	-	Argor	Canada	America North	①Rukhlov, A. S., & Bell, K. (2010). Geochronology of carbonatites from the Canadian and Baltic Shields, and the Canadian Cordillera: clues to mantle evolution. Mineralogy and Petrology, 98(1-4), 11-54.②Ernst, R. E., & Bell, K. (2010). Large igneous provinces (LIPs) and carbonatites. Mineralogy and Petrology, 98(1-4), 55-76.
198	198	-81.167	50.217	1695	1886	1886	0.9	Zircon	U-Pb	Sövite	-	Goldray	Canada	America North	Rukhlov, A. S., & Bell, K. (2010). Geochronology of carbonatites from the Canadian and Baltic Shields, and the Canadian Cordillera: clues to mantle evolution. Mineralogy and Petrology, 98(1-4), 11-54.
199	199	-81	49.917									Lewers Township	Canada	America North	None
200	200	-81.5	50		1114.7	1114.7	1.1	Baddeleyite	U-Pb	Amphibole-magnetite-phlogopite-olivine-apatite sövite	ID-TIMS	Valentine Township	Canada	America North	Rukhlov, A. S., & Bell, K. (2010). Geochronology of carbonatites from the Canadian and Baltic Shields, and the Canadian Cordillera: clues to mantle evolution. Mineralogy and Petrology, 98(1-4), 11-54.
201	201	-82.083	49.833	1072	1075	1075	15	wholerock	Rb-Sr	dike like mass mainly of carbonatite,	-	Clay-Howells	Canada	America North	①Bell, K. , Blenkinsop, J. , Cole, T. J. S. , & Menagh, D. P. . (1982). Evidence from sr isotopes for long-lived heterogeneities in the upper mantle. Nature, 298(5871), 251-253. ②Lewchuk, M. T. , & Symons, D. T. A. . (1990). Paleomagnetism of the clay-howells carbonatite complex: constraints on proterozoic motion in the kapuskasing structural zone, superior province, canada. Tectonophysics, 172(1…
202	202	-83.417	50.333									Martison Lake	Canada	America North	None
203	203	-84.333	50.167									Nagagami River Belt	Canada	America North	None
204	204	-86.2	49.967		1022	1022	31	amphibole	K-Ar	fenite	-	Chipman Lake	Canada	America North	①Sage, R.P., 1985. Geology of Carbonatite-Alkalic Rock Complexes of Ontario. Chipman Lake Area. Districts of Thunder Bay and Cochrane. Ontario Geological Survey Study 44. ②Okay, imen, Corinne, Kuebler, Stefanie, & S., et al. (2019). Combined boron, radiogenic (nd, pb, sr), stable (c, o) isotopic and geochemical investigations of carbonatites from the blue river region, british columbia (canada): …
205	205	-82.817	49.317	1740	1896.8	1896.8	1.4	baddeleyite	U-Pb	sövite	ID-TIMS	Cargill	Canada	America North	Rukhlov, A. S., & Bell, K. (2010). Geochronology of carbonatites from the Canadian and Baltic Shields, and the Canadian Cordillera: clues to mantle evolution. Mineralogy and Petrology, 98(1-4), 11-54.
206	206	-86.717	49.033	1023	1157.2	1157.2	2.3	Baddeleyite	U-Pb	Carbonatite	SIMS	Prairie Lake	Canada	America North	Wu F Y, Mitchell R H, Li Q L, et al. Emplacement age and isotopic composition of the Prairie Lake carbonatite complex, Northwestern Ontario, Canada[J]. Geological Magazine, 2017, 154(2): 217-236.
207	207	-84.667	48	1048	1142.6	1142.6	1.6	Kimzeyite	Pb-Pb	Apatite-phlogopite-olivine silicocarbonatite	ID-TIMS	Firesand River	Canada	America North	Rukhlov, A. S., & Bell, K. (2010). Geochronology of carbonatites from the Canadian and Baltic Shields, and the Canadian Cordillera: clues to mantle evolution. Mineralogy and Petrology, 98(1-4), 11-54.
208	208	-83.083	48	1015	1107	1107		Zircon	U-Pb	-	-	Nemegosenda Lake	Canada	America North	Heaman, L. M., & Machado, N. (1992). Timing and origin of midcontinent rift alkaline magmatism, North America: evidence from the Coldwell Complex. Contributions to Mineralogy and Petrology, 110(2-3), 289-303.	Unpublished data
209	209	-83.183	47.917	1872	1882	1882	3.9	Zircon	Pb-Pb	Apatite sövite	ID-TIMS	Borden	Canada	America North	Rukhlov, A. S., & Bell, K. (2010). Geochronology of carbonatites from the Canadian and Baltic Shields, and the Canadian Cordillera: clues to mantle evolution. Mineralogy and Petrology, 98(1-4), 11-54.
210	210	-83.167	47.75	1108	1102	1167-1067		-，whole rock and mineral, whole rock	K-Ar, Rb-Sr, Rb-Sr	-	-	Lackner Lake and Portage	Canada	America North	①Woolley and Kjarsgaard, 2008; ②Owen, L. B., & Faure, G. (1977). Rb-Sr dating of the Lackner Lake Complex, northern Ontario, Canada. Precambrian Research, 5(3), 299-303.		Average	Average
211	211	-83.317	46.983	1103	1103	1103		Biotite	K-Ar	-	-	Seabrook Lake	Canada	America North	Woolley and Kjarsgaard, 2008
212	212	-81.717	46.583	1560	1880.6	1880.6	2.4	Baddeleyite	Pb-Pb	Sövite	ID-TIMS	Venturi Township (Spanish River)	Canada	America North	Rukhlov, A. S., & Bell, K. (2010). Geochronology of carbonatites from the Canadian and Baltic Shields, and the Canadian Cordillera: clues to mantle evolution. Mineralogy and Petrology, 98(1-4), 11-54.
213	213	-81.333	46.317									Kusk Lake	Canada	America North	None
214	214	-81.233	46.367	1196	1196	1196	11	Biotite	K-Ar	Fenite	-	Nemag Lake	Canada	America North	Woolley and Kjarsgaard, 2008
215	215	-79.95	46.45									Springer Township	Canada	America North	None
216	216	-79.917	46.25									Iron Island	Canada	America North	Bell, K., Blenkinsop, J., 1987. Archean depleted mantle - Evidence from Nd and Sr initial isotopic ratios of carbonatites. Geochimica et Cosmochimica Acta, 51(2): 291-298.	Having inferred age	Average
217	217	-79.75	46.25									Burritt Island	Canada	America North	Bell, K., Blenkinsop, J., 1987. Archean depleted mantle - Evidence from Nd and Sr initial isotopic ratios of carbonatites. Geochimica et Cosmochimica Acta, 51(2): 291-298.	Having inferred age	Average
218	218	-79.583	46.25	560	585	585	19	Zircon	Pb-Pb	Sövite	ID-TIMS	Manitou Islands	Canada	America North	Rukhlov, A. S., & Bell, K. (2010). Geochronology of carbonatites from the Canadian and Baltic Shields, and the Canadian Cordillera: clues to mantle evolution. Mineralogy and Petrology, 98(1-4), 11-54.
219	219	-79.333	46.25	568	577	577	1	Zircon	U-Pb	Nepheline syenite	-	Callander Bay	Canada	America North	Kamo, S. L., Krogh, T. E., & Kumarapeli, P. S. (1995). Age of the Grenville dyke swarm, Ontario–Quebec: implications for the timing of lapetan rifting. Canadian Journal of Earth Sciences, 32(3), 273-280.
220	220	-78.9	46.067	576	576	576	40	Whole rock	K-Ar	-	-	Brent	Canada	America North	Woolley and Kjarsgaard, 2008
221	221	-78.25	46.1									Allan Lake	Canada	America North	None
222	222	-76.783	45.75									Sullivan Island	Canada	America North	None
223	223	-75.65	45.667									Dam Lake	Canada	America North	None
224	224	-75.7	45.6									Partridge Lake	Canada	America North	None
225	225	-75.867	45.583	930	1028	1028	-	Apatite	Sm-Nd	carbonatite	-	Meach Lake	Canada	America North	①Donald D. Hogarth; Chemical Trends in the Meech Lake, QuÉbec, Carbonatites and Fenites. The Canadian Mineralogist ; 54 (5): 1105–1128. doi: https://doi.org/10.3749/canmin.1400061. ②Marcantonio, F. (1986) Isotope geochemistry of the McCloskey's Field carbonatite complex . B.Sc. thesis, Carleton University, Ottawa, Ontario, Canada.
226	226	-75.733	45.567									Haycock Property	Canada	America North	None
227	227	-75.7	45.567									Quinville and Templeton	Canada	America North	None
228	228	-75.55	45.467	190	190	190		Phlogopite	K-Ar	-	-	Francon Quarry - Orleans	Canada	America North	Woolley and Kjarsgaard, 2008
229	229	-74.333	45.567									St-Andre	Canada	America North	None
230	230	-74	45.5	117	113	113	2.1	Apatite	Pb-Pb	Carbonatite	LA-ICP-MS	Oka	Canada	America North	Chen, W., Simonetti, A., 2013. In-situ determination of major and trace elements in calcite and apatite, and U-Pb ages of apatite from the Oka carbonatite complex: Insights into a complex crystallization history. Chemical Geology, 353: 151-172.
231	231	-73.617	45.567									Francon Quarry - Montreal	Canada	America North	None
232	232	-75.967	46.783									Baie Mercier	Canada	America North	None
233	233	-75.533	48.617	973	973	973	36	Biotite	K-Ar	-	-	Megiscane Lake	Canada	America North	Woolley and Kjarsgaard, 2008
234	234	-76.833	49.25									Canton Grevet	Canada	America North	None
235	235	-76.533	49.817		1894.2	1894.2	3.5	Zircon	U-Pb	Alkaline complex	-	Montviel	Canada	America North	①David, J., Dion, C., Goutier, J., Roy, P., Bandyayera, D., Legault, M., & Rhéaume, P. (2006). Datations U-Pb effectuées dans la Sous-province de l’Abitibi à la suite des travaux de 2004-2005. Ministère des Ressources naturelles et de la Faune, Québec, (2006-04), 22. ②Nadeau, O., Stevenson, R., & Jébrak, M. (2018). Interaction of mantle magmas and fluids with crustal fluids at the 1894 Ma Montvie…
236	236	-75.883	49.583	2691	2690	2690	5/-3	Zircon	U-Pb	-	-	Lac Shortt	Canada	America North	①Dion, C., Machado, N., & Joanisse, A. (1995). Preliminary U-Pb ages of felsic and alkaline intrusions associated with gold mineralization in the Caopatina segment, Chibougamau area, Quebec. In, Precambrian'95. In International conference on tectonics and metallogeny of early/mid Proterozoic orogenic belts, Montreal, Canada. Program and abstracts volume (p. 292).②Tilton, G. R. , & Bell, K. . (199…
237	237	-75	49.767	2640	2677	2677	-	Apatite	U-Th-Pb	Carbonatite	-	Dolodau Stock	Canada	America North	①Tilton, G. R. , & Bell, K. . (1994). Sr-nd-pb isotope relationships in late archean carbonatites and alkaline complexes: applications to the geochemical evolution of archean mantle. Geochimica Et Cosmochimica Acta, 58(15), 3145-3154.②Nadeau, O. . (2019). Sources of fluids in archean hydrothermal stockwork-disseminated gold deposits of abitibi, canada: insights from duquesne, dolodau, lac shortt …
238	238	-73	49.5	879	879	879		-	K-Ar	-	-	Crevier	Canada	America North	Woolley and Kjarsgaard, 2008
239	239	-71.233	48.8	564	564	564		Whole rock and biotite	K-Ar	-	-	Arvida	Canada	America North	Woolley and Kjarsgaard, 2008		Average	Average
240	240	-71.067	48.55	642	571	571	5	Phlogopite	Ar-Ar			St-Honore	Canada	America North	①McCausland, P. J., Pisarevsky, S., Jourdan, F., & Higgins, M. (2009). Laurentia at 571 Ma: Preliminary paleomagnetism and Ar-Ar age of the Ediacaran St Honore alkali intrusion, Quebec. Proceedings, American Geophysical Union–Geological Association of Canada–Mineralogical Association of Canada–Canadian Geophysical Union (CGU), Joint Assembly, Toronto, abs, GA12A-01.②Vadim S. Kamenetsky, Roger H. …
241	241	-68.267	49.2									Baie-Comeau	Canada	America North	None
242	242	-58.917	50.833	569	566	566		Biotite	K-Ar	-	-	Baie-Des-Moutons	Canada	America North	Doig, R., & Barton Jr, J. M. (1968). Ages of carbonatites and other alkaline rocks in Quebec. Canadian Journal of Earth Sciences, 5(6), 1401-1407.		Average
243	243	-59.25	55.25	572	572	590.9-548.2		Perovskite, phlogopite	U-Pb, Ar-Ar	-	-	Aillik Bay	Canada	America North	Woolley and Kjarsgaard, 2008		Average	Average
244	244	-68.833	56.417	1873	1873	1873	53	Whole rock	K-Ar	Lamprophyre	-	Castignon Lake	Canada	America North	Woolley and Kjarsgaard, 2008
245	245	-68.417	57.08									Eldor (Lake LeMoyne)	Canada	America North	None
246	246	-64.983	59.233	572	573	608.4-535		Perovskite, phlogopite	U-Pb, Ar-Ar	-	-	Torngat Mountains	Canada	America North	①Woolley and Kjarsgaard, 2008; ②Tappe, S., Foley, S. F., Jenner, G. A., Heaman, L. M., Kjarsgaard, B. A., Romer, R. L., ... & Hoefs, J. (2006). Genesis of ultramafic lamprophyres and carbonatites at Aillik Bay, Labrador: a consequence of incipient lithospheric thinning beneath the North Atlantic craton. Journal of Petrology, 47(7), 1261-1315.		Average	Average
247	247	-77.317	58.15									Narsaaluk	Canada	America North	None
248	248	-75.85	60.283	2659	2659	2659	1.9	Zircon	Pb-Pb	-	-	Lac Couture	Canada	America North	Woolley and Kjarsgaard, 2008
249	249	-33.15	68.617	50.3	50.3	50.3	1.4	Titanite and apatite	Fission-track	-	-	Gardiner	Greenland	America North	Woolley and Kjarsgaard, 2008
250	250	-53.1	71.4	600	600	600	15	Biotite	K-Ar	-	-	Quigussaq	Greenland	America North	Woolley and Kjarsgaard, 2008
251	251	-53.583	66.917									Holsteinsborg	Greenland	America North	None
252	252	-51.7	65.383	172	165	165	0.9	Phlogopite	Rb-Sr	Carbonatite	TIMS	Qaqarssuk	Greenland	America North	Secher, K. et al., 2009. Timing of kimberlite, carbonatite, and ultramafic lamprophyre emplacement in the alkaline province located 64 degrees-67 degrees N in southern West Greenland. Lithos, 112: 400-406.
253	253	-51.25	66.5	601	564.8	564.8	4.9	Phlogopite	Rb-Sr	Carbonatite	TIMS	Sarfartoq	Greenland	America North	Secher, K. et al., 2009. Timing of kimberlite, carbonatite, and ultramafic lamprophyre emplacement in the alkaline province located 64 degrees-67 degrees N in southern West Greenland. Lithos, 112: 400-406.
254	254	-51.75	65.417	2655	3007	3007	2	Baddeleyite	U-Pb	Carbonatite	ID-TIMS	Tupertalik	Greenland	America North	Bizzarro, M., Simonetti, A., Stevenson, R. K., & David, J. (2002). Hf isotope evidence for a hidden mantle reservoir. Geology, 30(9), 771-774.
255	255	-50	62.667	150	150	150						Frederikshabs Isblink	Greenland	America North	Woolley and Kjarsgaard, 2008
256	256	-49.5	61.9	162	162	162						Ilulilarssuk	Greenland	America North	Woolley and Kjarsgaard, 2008
257	257	-48.05	61.233	1327	1325	1325	6	Zircon	U–Pb	Syenites		Gronnedal-Ika	Greenland	America North	①Stockmann G, Karlsson A, Lewerentz A, Thomsen TB, Kokfelt TF, Tollefsen E, Sturkell E, Lundqvist L (2018) New Rb–Sr and zircon U–Pb dating of the Grønnedal-Íka igneous complex, SW Greenland. In: Nordic geological winter meeting 2018, Copenhagen, Denmark. Abstract volume. p 38. ②Ranta, E., Stockmann, G., Wagner, T., Fusswinkel, T., Sturkell, E., Tollefsen, E., & Skelton, A. (2018). Fluid–rock rea…
258	258	-45.583	61.15		1176	1176	8	Apatite	Pb-Pb	Phosphorus	Finnigan MAT 262 mass spectrometer	Qagssiarssuk	Greenland	America North	Andersen, T. (1997). Age and petrogenesis of the Qassiarsuk carbonatite-alkaline silicate volcanic complex in the Gardar rift, South Greenland. Mineralogical Magazine,61(4), 499-513.
259	259	-45.417	61.183									Narssarssuaq	Greenland	America North	None
260	260	-45.167	61.133	1238		1341-1152		Whole rock	Rb-Sr	-	-	Igaliko	Greenland	America North	①Woolley and Kjarsgaard, 2008; ②Blaxland, A. B., van Breemen, O., Emeleus, C. H., & Anderson, J. G. (1978). Age and origin of the major syenite centers in the Gardar province of south Greenland: Rb-Sr studies. Geological Society of America Bulletin, 89(2), 231-244.		Average
261	261	-119.583	48.967									Shankers Bend Diatreme	USA	America North	None
262	262	-115.433	48.433	94	94	94		Biotite	Rb-Sr	Biotitite	-	Rainy Creek	USA	America North	Woolley and Kjarsgaard, 2008
263	263	-109.733	48.167		52	52	2	Biotite	K-Ar	Carbonatite		Rocky Boy Stock	USA	America North	Faul, H. (1960). Geologic time scale. Geological Society of America Bulletin, 71(5), 637-644.
264	264	-113.333	45.5	95	95	99-90		Monazite	Pb-alpha	-	-	Ravalli and Lemhi Counties	USA	America North	Woolley and Kjarsgaard, 2008		Average	Average
265	265	-104.45	44.483	44.5	51.45	51.45	0.08	K-feldspar	Ar-Ar	Carbonatite	-	Bear Lodge Mountains	USA	America North	Andersen, A. K., Larson, P. B., & Cosca, M. A. (2019). C–O stable isotope geochemistry and 40Ar/39Ar geochronology of the Bear Lodge carbonatite stockwork, Wyoming, USA. Lithos, 324, 640-660.
266	266	-105.6	40.95									Sloan Pipe	USA	America North	None
267	267	-96.2	40.3		510	540/480	14/20	Zircon	U-Pb	Syenite	-	Elk Creek	USA	America North	①Campbell, E. (2017). Sulfur Isotope Variations in the Elk Creek Carbonatite Complex, Southeastern Nebraska, USA. ②Farmer, G. L., Kettler, R. M., & Verplanck, P. L. (2013). Geochemical and isotopic constraints on the age and origin of the Elk Creek carbonatite complex, southeast Nebraska. In Geological Society of America 65th Annual Meeting (pp. 21-7). ③Drenth, B. J. (2014). Geophysical expressio…			Average
268	268	-105.467	38.517									Amethyst and Gribble Mountain	USA	America North	None
269	269	-105.55	38.417									McCoy Gulch	USA	America North	None
270	270	-105.483	38.433									Goldie	USA	America North	None
271	271	-105.467	38.35	528	528	535-506		Amphibole and biotite, whole rock and mineral, titanite	K-Ar, Rb-Sr, fission-track	-, mineral-rock and nepheline syenite, -		McClure Mountain-Iron Mountain	USA	America North	Woolley and Kjarsgaard, 2008		Average	Average
272	272	-105.45	38.333									Wet Mountains	USA	America North	None
273	273	-105.367	38.267	511	511	511	8	Whole rock	Rb-Sr	-	-	Democrat Creek	USA	America North	Woolley and Kjarsgaard, 2008
274	274	-105.55	38.267	551	551	551		Riebeckite	K-Ar	Fenite		Gem Park	USA	America North	Woolley and Kjarsgaard, 2008
275	275	-107.05	38.25	579		579/1487		Whole rock and mineral	K-Ar, Rb-Sr	Iron hill complex	-	Iron Hill	USA	America North	Michael, Dwight, Fenton, G., Faure, 1970. Rb-Sr Whole-Rock Age Determinations of the Iron Hill and McClure Mountain Carbonatite-Alkalic Complexes, Colorado. The mountain Geologist.	Questionable accuracy
276	276	-115.533	35.483	1415	1371	1371	10	Monazite	Th-Pb	Carbonatite	LASS-ICP-MS	Mountain Pass	USA	America North	Poletti, J.E., Cottle, J.M., Hagen-Peter, G.A., Lackey, J.S., 2016. Petrochronological Constraints on the Origin of the Mountain Pass Ultrapotassic and Carbonatite Intrusive Suite, California. Journal of Petrology, 57(8): 1555-1598.
277	277	-106.983	34.167		449	449	16	Biotite	K-Ar	Silicocarbonatite	-	Lemitar Mountains	USA	America North	Virginia T. McLemore Geology and Regional Implications of Carbonatites in the Lemitar Mountains, Central NewMexico Source: The Journal of Geology, Vol. 95, No. 2 (Mar., 1987), pp. 255-270
278	278	-106.967	33.867									Chupadera Mountains	USA	America North	None
279	279	-92.767	35.017									Perry And Conway Counties	USA	America North	None
280	280	-93.167	34.5									Potash Sulphur Springs	USA	America North	None
281	281	-93.167	34.333									Montgomery County	USA	America North	None
282	282	-92.867	34.45	99	99	99		Biotite, whole rock, apatite and titanite	K-Ar, Rb-Sr, fission-track	-, -, carbonatite and syenite	-	Magnet Cove	USA	America North	Woolley and Kjarsgaard, 2008		Average	Average
283	283	-74.7	41.233	430	431	431		Biotite	K-Ar, Rb-Sr	Nepheline syenite	-	Beemerville	USA	America North	Woolley and Kjarsgaard, 2008		Average	Average
284	284	-60.717	-15.5									Cerro Manomo	Bolivia	America South	None
285	285	-66.95	-17.017									Cerro Sapo	Bolivia	America South	None
286	286	-66.967	-17.017									Chiaracke	Bolivia	America South	None
287	287	-66.683	-0.283			1328/~200	58	Zircon	U-Pb	carbonatite	LA-ICP-MS	Seis Lagos	Brazil	America South	①Giovannini, A. L., Mitchell, R. H., Neto, A. C. B., Moura, C. A., Pereira, V. P., & Porto, C. G. (2020). Mineralogy and geochemistry of the Morro dos Seis Lagos siderite carbonatite, Amazonas, Brazil. Lithos, 360, 105433. ②Rossoni, M. B. , Bastos Neto, A. C. , Souza, V. S. , Marques, J. C. , Dantas, E. , & Botelho, N. F. , et al. (2017). U-pb zircon geochronologycal investigation on the morro do…
288	288	-54.233	-0.5		589	589	18	-	-	-	-	Maicuru	Brazil	America South	Costa, M. L., Fonseca, L. R., Angélica, R. S., Lemos, V. P., & Lemos, R. L. (1991). Geochemical exploration of the Maicuru alkaline-ultramafic-carbonatite complex, northern Brazil. Journal of Geochemical Exploration, 40(1-3), 193-204.
289	289	-43.367	-9.3	2011	2011	2011	6	Zircon and baddeleyite	U-Pb	Carbonatite	-	Angico dos Dias	Brazil	America South	Woolley and Kjarsgaard, 2008
290	290	-51.667	-15.533									Morro Do Engenho	Brazil	America South	None
291	291	-51.75	-16									Caiapo	Brazil	America South	None
292	292	-50.7	-17.5	98	98	130-70		-	K-Ar	-	-	Santo Antonio Da Barra	Brazil	America South	Woolley and Kjarsgaard, 2008		Average	Average
293	293	-47.867	-18.033		82	82	3	Baddeleyite	U-Pb	apatitite/magnetitite	LA-ICP-MS	Catalao II	Brazil	America South	Guarino, V., Wu, F. Y., Melluso, L., de Barros Gomes, C., Tassinari, C. C. G., Ruberti, E., & Brilli, M. (2017). U–Pb ages, geochemistry, C–O–Nd–Sr–Hf isotopes and petrogenesis of the Catalão II carbonatitic complex (Alto Paranaíba Igneous Province, Brazil): implications for regional-scale heterogeneities in the Brazilian carbonatite associations. International Journal of Earth Sciences, 106(6), …
294	294	-47.833	-18.133	82.9	78	78	1	Perovskite	U-Pb	phlogopite-picrites	LA-ICP-MS	Catalao I	Brazil	America South	Guarino, V., Wu, F. Y., Melluso, L., de Barros Gomes, C., Tassinari, C. C. G., Ruberti, E., & Brilli, M. (2017). U–Pb ages, geochemistry, C–O–Nd–Sr–Hf isotopes and petrogenesis of the Catalão II carbonatitic complex (Alto Paranaíba Igneous Province, Brazil): implications for regional-scale heterogeneities in the Brazilian carbonatite associations. International Journal of Earth Sciences, 106(6), …
295	295	-46.833	-18.917	81.6	79.1	79.1	8.7	Apatite	fission-track	Carbonatite	-	Serra Negra	Brazil	America South	①Woolley and Kjarsgaard, 2008; ②Eby, G. N., & Mariano, A. N. (1992). Geology and geochronology of carbonatites and associated alkaline rocks peripheral to the Paraná Basin, Brazil-Paraguay. Journal of South American Earth Sciences, 6(3), 207-216.		Average
296	296	-46.783	-19.05	80.7	87.1	87.1	3.7	Apatite	fission-track	Carbonatite	-	Salitre	Brazil	America South	①Woolley and Kjarsgaard, 2008; ②Eby, G. N., & Mariano, A. N. (1992). Geology and geochronology of carbonatites and associated alkaline rocks peripheral to the Paraná Basin, Brazil-Paraguay. Journal of South American Earth Sciences, 6(3), 207-216.		Average
297	297	-46.1	-19.35	78.2	78.2	78.2	4	Whole rock	K-Ar	Pulaskite	-	Sao Gotardo	Brazil	America South	Woolley and Kjarsgaard, 2008
298	298	-46.95	-19.667	87.2	87.2	87.2	4.4	Biotite	K-Ar	Glimmerite	-	Araxa	Brazil	America South	Woolley and Kjarsgaard, 2008
299	299	-46.833	-19.883	69.5	79.15	79.15	0.6	Phlogopite	Ar-Ar	Syenites and bebedourite	high-resolution laser-heating 40Ar/39Ar geochronology	Tapira	Brazil	America South	Conceição, F. T., Vasconcelos, P. M., Godoy, L. H., & Navarro, G. R. (2020). 40Ar/39Ar geochronological evidence for multiple magmatic events during the emplacement of Tapira alkaline-carbonatite complex, Minas Gerais, Brazil. Journal of South American Earth Sciences, 97, 102416.
300	300	-47.6	-23.433	127.7	124.9	124.9	9.5	Biotite	K-Ar	Shonkinite	-	Ipanema	Brazil	America South	①Sonoki, I. K., & Garda, G. M. (1988). Idades K-Ar de rochas alcalinas do Brasil Meridional e Paraguai Oriental: compilação e adaptação às novas constantes de decaimento. Boletim IG-USP. Série Científica, 19, 63-85. ②Gomes, C. B., Ruperti, E., & Morbidelli, L. (1990). Carbonatite complexes from Brazil: a review. Journal of South American Earth Sciences, 3(1), 51-63. ③Speziale, S., Castorina, F., …
301	301	-46.783	-24.183	132.8	132.8	132.8	4.6	-	K-Ar	-	-	Itanhaem	Brazil	America South	Woolley and Kjarsgaard, 2008
302	302	-47.817	-24.383	143	134	134	1.6	Biotite	K-Ar	ijolite	-	Juquia	Brazil	America South	①Sonoki, I. K., & Garda, G. M. (1988). Idades K-Ar de rochas alcalinas do Brasil Meridional e Paraguai Oriental: compilação e adaptação às novas constantes de decaimento. Boletim IG-USP. Série Científica, 19, 63-85. ②Gomes, C. B., Ruperti, E., & Morbidelli, L. (1990). Carbonatite complexes from Brazil: a review. Journal of South American Earth Sciences, 3(1), 51-63. ③Speziale, S., Castorina, F., …
303	303	-48.133	-24.7	131	134.9	134.9	1.3	Zircon	U-Pb	monzonite	SHRIMP	Jacupiranga	Brazil	America South	Chmyz, L., Arnaud, N., Biondi, J. C., Azzone, R. G., Bosch, D., & Ruberti, E. (2017). Ar-Ar ages, Sr-Nd isotope geochemistry, and implications for the origin of the silicate rocks of the Jacupiranga ultramafic-alkaline complex (Brazil). Journal of South American Earth Sciences, 77, 286-309.
304	304	-49.2	-24.5	103.1	101.96	101.96	0.65	Biotite	Ar-Ar	melteigite and nepheline syenite	-	Itapirapua	Brazil	America South	Gomes, C. D. B., Azzone, R. G., Ruberti, E., Vasconcelos, P. M. D., Sato, K., & Rojas, G. E. E. (2018). New age determinations for the Banhadão and Itapirapuã complexes in the Ribeira Valley, southern Brazil. Brazilian Journal of Geology, 48(2), 403-414.
305	305	-49.217	-24.683		128	128	19	-	Rb-Sr	-	-	Barra do Itapirapua	Brazil	America South	①Ruberti, E., Castorina, F., Censi, P., Gomes, C. B., Speziale, S., & Comin-Chiaramonti, P. (1997). REE±O±±Sr±Nd systematics in carbonatites from Barra do ItapirapuaÄ and Mato Preto southern Brazil). South America Symposium on Isotope Geology SSAGI), Campos de JordaÄo, Brazil. In Extended Abstracts (pp. 271-275). ②Gomes, C. D. B., Azzone, R. G., Ruberti, E., Vasconcelos, P. M. D., Sato, K., & Roj…
306	306	-49.2	-24.75	66.3	70	70	1	-	-	-	-	Mato Preto	Brazil	America South	①Comin-Chiaramonti, P., Gomes, C. B., Ruberti, E., Antonini, P., Castorina, F., & Censi, P. (2001). Mato Preto alkaline-carbonatite complex: geochemistry and isotope (OC, Sr-Nd) constraints. Geochimica Brasiliensis, 15(1/2), 023-034. ②Speziale, S., Castorina, F., Censi, P., de Barros Gomes, C., Marques, L. S., & Comin-Chiaramonti, P. (2020). Carbonatites from the Southern Brazilian platform: I. O…
307	307	-50.25	-27.667	76	76	76		-	K-Ar	-	-	Lages	Brazil	America South	Woolley and Kjarsgaard, 2008
308	308	-49.15	-27.9	113.1	131	131	1	-	Ar-Ar	-	-	Anitapolis	Brazil	America South	①Speziale, S., Castorina, F., Censi, P., de Barros Gomes, C., Marques, L. S., & Comin-Chiaramonti, P. (2020). Carbonatites from the Southern Brazilian platform: I. Open Geosciences, 12(1), 452-478. ②Guarino, V., Azzone, R. G., Brotzu, P., de Barros Gomes, C., Melluso, L., Morbidelli, L., ... & Brilli, M. (2012). Magmatism and fenitization in the Cretaceous potassium-alkaline-carbonatitic complex …
309	309	-57.167	1.983	1025	1025	1025	28	Feldspar	K-Ar	-	-	Twareitau	Guyana	America South	Woolley and Kjarsgaard, 2008
310	310	-55.95	-22.65	128	128	128	5	Biotite	K-Ar	Sövite	-	Chiriguelo (Cerro Chiriguelo)	Paraguay	America South	Woolley and Kjarsgaard, 2008
311	311	-56.25	-22.75	98	86.3	86.3	2.6	Apatite	Fission-track	Pyroxenite and carbonatite	-	Cerro Sarambi	Paraguay	America South	①Woolley and Kjarsgaard, 2008; ②Eby, G. N., & Mariano, A. N. (1992). Geology and geochronology of carbonatites and associated alkaline rocks peripheral to the Paraná Basin, Brazil-Paraguay. Journal of South American Earth Sciences, 6(3), 207-216.		Average
312	312	-65.167	6									Cerro Impacto	Venezuela	America South	None
313	313	162.683	-78.25	531	531	531	5.5	Zircon	U-Pb			South Victoria Land	Antarctica	Antarctica	Woolley and Kjarsgaard, 2008
314	314	71.183	34.25									Khyber	Afghanistan	Asia	None
315	315	68.1	33.233									Dasht-I-Nawar	Afghanistan	Asia	None
316	316	63.567	30.45		3.83	3.83		Phlogopite	Ar-Ar	Sövite	-	Khanneshin	Afghanistan	Asia	Horton, F. (2021). Rapid recycling of subducted sedimentary carbon revealed by Afghanistan carbonatite volcano. Nature Geoscience, 1-5.
317	317	63.567	29.7									Zardag	Afghanistan	Asia	None
318	318	79	39.5	332	266	266	5.3	Monazite	Th–Pb	Carbonatite	SIMS	Wajiltag	China	Asia	Song, W., Xu, C., Chakhmouradian, A. R., Kynicky, J., Huang, K., & Zhang, Z. (2017). Carbonatites of Tarim (NW China): first evidence of crustal contribution in carbonatites from a large igneous province. Lithos, 282, 1-9.
319	319	82.417	42.217		266.5	266.5	2.9	Whole rock	Sm-Nd	Alkali granite	-	Keqikeguole	China	Asia	①Zou, T.R., Xu, J., Yang, Y.Q., Zhang, J.H., Zhou, Y.L., Wu, C.Y., Yu, S.M., Wan, D.F., Lin, Y.Y., Xia, F.R., 1995. Study on Alkali Rocks and Related Mineralization in Yilanlike Area. Xinjiang No 305 National Project Office, 24-39. ②Fuwen, C., Huaqin, L., & Yuanfa, L. (2002). Temporo‐spatial distribution of rare metal and REE deposits in Xinjiang, Northwest China. Acta Geologica Sinica‐English Ed…
320	320	82.95	42.333		931	931	28	Zircon	U-Pb	Alkali rocks	-	Yilanlik	China	Asia	①Zou, T.R., Xu, J., Yang, Y.Q., Zhang, J.H., Zhou, Y.L., Wu, C.Y., Yu, S.M., Wan, D.F., Lin, Y.Y., Xia, F.R., 1995. Study on Alkali Rocks and Related Mineralization in Yilanlike Area. Xinjiang No 305 National Project Office, 24-39. ②Fuwen, C., Huaqin, L., & Yuanfa, L. (2002). Temporo‐spatial distribution of rare metal and REE deposits in Xinjiang, Northwest China. Acta Geologica Sinica‐English Ed…
321	321	86.167	41.333	6.3	814.7	814.7	3.6	Baddeleyite	Pb-Pb	Carbonatite	SIMS	Yuli(Qieganbulake)	China	Asia	Li, Q. L., Li, X. H., Liu, Y., Tang, G. Q., Yang, J. H., & Zhu, W. G. (2010). Precise U–Pb and Pb–Pb dating of Phanerozoic baddeleyite by SIMS with oxygen flooding technique. Journal of Analytical Atomic Spectrometry, 25(7), 1107-1113.
322	322	101	39.167		405	405	21	Zircon	U-Pb	Carbonatite	SIMS	Taohualashan	China	Asia	Xue, S., Ling, M. X., Liu, Y. L., & Sun, W. (2018). Recycling of subducted carbonates: formation of the Taohuala Mountain carbonatite, North China Craton. Chemical Geology, 478, 89-101.	weighted mean age
323	323	110	41.75		1317	1317	140	Apatite	Sm-Nd	coarse-grained dolomite	-	Bayan Obo	China	Asia	Yang, K., Fan, H., Pirajno, F., & Li, X. (2019). The Bayan Obo (China) giant REE accumulation conundrum elucidated by intense magmatic differentiation of carbonatite. Geology, 47(12), 1198-1202.
324	324	110.833	38.333	134.8	132.3	132.3	2.1	Zircon	U-Pb	Trachytic porphyry	SHRIMP	Zijinshan	China	Asia	Xingke, Y., Huixia, C., Volkova, N. I., Menglin, Z., & Weihua, Y. (2009). Geochemistry and SHRIMP geochronology of alkaline rocks of the Zijinshan massif in the eastern Ordos basin, China. Russian Geology and Geophysics, 50(9), 751-762.
325	325	113	40	229	132.9	132.9	0.6	Zircon	U-Pb	Tashan carbonatite	LA-ICP-MS	Huairen-Yaozitou (Datong)	China	Asia	①LIU, S., FENG, C., LAI, S., HU, R., FENG, G., YANG, Y., & COULSON, I. (2014). Geochemical, Sr-Nd isotope, and zircon U-Pb geochronological constraints on the origin of Early Cretaceous carbonatite dykes, northern Shanxi Province, China. ACTA PETROLOGICA SINICA, 30(2), 350-360. ②Yan, G. H., Mu, B. L., Zeng, Y. S., Cai, J. H., Ren, K. X., & Li, F. T. (2007). Igneous carbonatites in North China Cra…
326	326	115.217	40.367	228	218	218	2	Zircon	U-Pb	Syenite	SHRIMP II	Fanshan	China	Asia	Ren, R., Mu, B. L., Han, B. F., Zhang, L., Chen, J. F., Xu, Z., & Song, B. (2009). Zircon SHRIMP U–Pb dating of the Fanshan potassic alkaline ultramafite–syenite complex in Hebei province, China. Acta Petrologica Sinica, 25(3), 588-594.
327	327	121.85	39.5833									Southern Liaoning	China	Asia	None
328	328	117.833	36.5	127	118	118	8.4	Phlogopite-whole rock-apatite	Rb-Sr	Carbonatite	-	Central Shandong Province(Laiwu-Zibo)	China	Asia	Ying, J., 2002. Geochemical characteristics and petrogenesis of Mesozoic carbonatites and volcanic rocks of Western Shandong Province, China. The Institute of Geology and Geophysics, Chinese Academy of Sciences, Doctoral dissertation, 120pp. (in Chinese with English abstract).
329	329	117.2	34.75	110	129.55	129.55	0.68	Bastnaesite	Th-Pb	Carbonatite	LA-ICP-MS	Weishan(Chishan)	China	Asia	Wang, C., Liu, J., Zhang, H., Zhang, X., Zhang, D., Xi, Z., & Wang, Z. (2019). Geochronology and mineralogy of the Weishan carbonatite in Shandong province, eastern China. Geoscience Frontiers, 10(2), 769-785.
330	330	110.167	34.667	181	209	209	2.9	Titanite	U-Pb	Carbonatite	LA-ICP-MS	Huayangchuan	China	Asia	Zheng, H., Chen, H., Li, D., Wu, C., Chen, X., & Lai, C. K. (2020). Timing of carbonatite-hosted U-polymetallic mineralization in the supergiant Huayangchuan deposit, Qinling Orogen: Constraints from titanite U–Pb and molybdenite Re–Os dating. Geoscience Frontiers, 11(5), 1581-1592.
331	331	110	34.333	206	208.9	208.9	4.6	Monazite	U-Th-Pb	Carbonatite	SIMS	Huanglongpu	China	Asia	Song, W., Xu, C., Smith, M. P., Kynicky, J., Huang, K., Wei, C., ... & Shu, Q. (2016). Origin of unusual HREE-Mo-rich carbonatites in the Qinling orogen, China. Scientific reports, 6, 37377.
332	333	104.867	33.917	13	23.09	23.09	0.15	Pplogopite	Ar-Ar	kamafugite	-	Lixian	China	Asia	Yu, X., Zhao, Z., Zhou, S., Mo, X., Zhu, D., & Wang, Y. (2006). 40 Ar/39 Ar dating for Cenozoic kamafugite from western Qinling in Gansu Province. Chinese Science Bulletin, 51(13), 1621-1627.
333	334	106.667	32.467									Lijiahe	China	Asia	None
334	335	106.567	32.45		869	869	4	Zircon	U-Pb	syenite	LA-ICP-MS	Shuimo	China	Asia	Gan, B. P., Lai, S. C., Qin, J. F., Zhu, R. Z., Zhao, S. W., & Li, T. (2017). Neoproterozoic alkaline intrusive complex in the northwestern Yangtze Block, Micang Mountains region, South China: petrogenesis and tectonic significance. International Geology Review, 59(3), 311-332.
335	336	106.717	32.45	462	891	891	7	Zircon	U-Pb	ijolite	SIMS	Pinghe	China	Asia	Zhou, J. L., Li, X. H., Tang, G. Q., Gao, B. Y., Bao, Z. A., Ling, X. X., ... & Liao, X. (2018). Ca. 890 Ma magmatism in the northwest Yangtze block, South China: SIMS U-Pb dating, in-situ Hf-O isotopes, and tectonic implications. Journal of Asian Earth Sciences, 151, 101-111.
336	337	109.833	32.5	264	426.5	426.5	8	Zircon	Th-Pb	Carbonatite	LA-ICP-MS	Miaoya(Zhushan)	China	Asia	Ying, Y., Chen, W., Lu, J., Jiang, S. Y., & Yang, Y. (2017). In situ U–Th–Pb ages of the Miaoya carbonatite complex in the South Qinling orogenic belt, central China. Lithos, 290, 159-171.
337	338	110.333	31.833	265	441.8	441.8	2.2	Zircon	U-Pb	Syenite	LA-ICP-MS	Shaxiongdong	China	Asia	Xu, C., Campbell, I. H., Allen, C. M., Chen, Y., Huang, Z., Qi, L., ... & Yan, Z. (2008). U–Pb zircon age, geochemical and isotopic characteristics of carbonatite and syenite complexes from the Shaxiongdong, China. Lithos, 105(1-2), 118-128.
338	339	95	29.5	4.5	4.5	4.5		Phlogopite	K-Ar	Carbonatite	-	Namjagbarwa	China	Asia	Woolley and Kjarsgaard, 2008
339	340	102	28.833	34	26.6	26.6	0.3	Zircon	U-Pb	Syenite	SIMS	Maoniuping	China	Asia	①Ling, X. X., Li, Q. L., Liu, Y., Yang, Y. H., Tang, G. Q., & Li, X. H. (2016). In situ SIMS Th–Pb dating of bastnaesite: constraint on the mineralization time of the Himalayan Mianning–Dechang rare earth element deposits. Journal of Analytical Atomic Spectrometry, 31(8), 1680-1687. ②Hou, Z., Liu, Y., Tian, S., Yang, Z., & Xie, Y. (2015). Formation of carbonatite-related giant rare-earth-element …
340	345	71.417	25.733									Danta-Langera-Mahabar	India	Asia	None
341	346	71.867	25.733		68.57	68.57	0.08	Biotite	Ar-Ar	alkali pyroxenite	-	Sarnu-Dandali(Barmer)	India	Asia	①Basu, A. R., Renne, P. R., DasGupta, D. K., Teichmann, F., & Poreda, R. J. (1993). Early and late alkali igneous pulses and a high-3He plume origin for the Deccan flood basalts. Science, 261(5123), 902-906. ②Randive, K., & Meshram, T. (2020). An Overview of the Carbonatites from the Indian Subcontinent. Open Geosciences, 12(1), 85-116.
342	347	75.783	27.833									Khetri	India	Asia	None
343	348	74.867	26.6									Kishengarh	India	Asia	None
344	349	72.517	24.833	67	68.53	68.53	0.16	Biotite	Ar-Ar	alkali olivine gabbro	-	Mundwara	India	Asia	①Basu, A. R., Renne, P. R., DasGupta, D. K., Teichmann, F., & Poreda, R. J. (1993). Early and late alkali igneous pulses and a high-3He plume origin for the Deccan flood basalts. Science, 261(5123), 902-906. ②Randive, K., & Meshram, T. (2020). An Overview of the Carbonatites from the Indian Subcontinent. Open Geosciences, 12(1), 85-116.
345	350	74.133	24.583	959	1473	1473	63	whole rock	Sm-Nd	carbonatite	-	Newania	India	Asia	Ray, J. S., Pande, K., Bhutani, R., Shukla, A. D., Rai, V. K., Kumar, A., ... & Panda, D. K. (2013). Age and geochemistry of the Newania dolomite carbonatites, India: implications for the source of primary carbonatite magma. Contributions to Mineralogy and Petrology, 166(6), 1613-1632.
346	351	70.167	24									Kala Doongar	India	Asia	None
347	352	71.55	21.033									Rajula	India	Asia	None
348	353	74.017	22.15									Panwad-Kawant	India	Asia	None
349	354	74.2	22.1									Bakhatgarh-Phulmahal	India	Asia	None
350	355	74.017	22.05		63	63	2	whole rock and phlogopite	Rb-Sr	carbonatite	-	Siriwasan-Dughda	India	Asia	①Viladkar, S. G., & Gittins, J. (2016). Trace elements and REE geochemistry of Siriwasan carbonatite, Chhota Udaipur, Gujarat. Journal of the Geological Society of India, 87(6), 709-715. ②Fosu, B. R., Ghosh, P., & Viladkar, S. G. (2020). Clumped isotope geochemistry of carbonatites in the north-western Deccan igneous province: Aspects of evolution, post-depositional alteration and mineralisation.…
351	356	74.067	21.983	67	65.5	65.5	0.8	Phlogopite	Ar-Ar	Carbonatite	-	Amba Dongar	India	Asia	①Woolley and Kjarsgaard, 2008; ②Ray, J. S., & Pande, K. (1999). Carbonatite alkaline magmatism associated with continental flood basalts at stratigraphic boundaries: Cause for mass extinctions. Geophysical Research Letters, 26(13), 1917-1920.		Average
352	357	90.833	25.5	107	107	107	4	Whole rock	K-Ar	Lamprophyre	-	Swangkre	India	Asia	Woolley and Kjarsgaard, 2008
353	358	92.117	25.567	107	106.8	106.8	1.5	Zircon	U-Pb	Syenite	SIMS	Sung Valley	India	Asia	Srivastava, R. K., Guarino, V., Wu, F. Y., Melluso, L., & Sinha, A. K. (2019). Evidence of sub-continental lithospheric mantle sources and open-system crystallization processes from in-situ U–Pb ages and Nd–Sr–Hf isotope geochemistry of the Cretaceous ultramafic-alkaline-(carbonatite) intrusions from the Shillong Plateau, north-eastern India. Lithos, 330, 108-119.
354	359	92.517	26.017	105.2	106.8	106.8	0.8	Zircon	U-Pb	Syenite	SIMS	Jasra	India	Asia	Srivastava, R. K., Guarino, V., Wu, F. Y., Melluso, L., & Sinha, A. K. (2019). Evidence of sub-continental lithospheric mantle sources and open-system crystallization processes from in-situ U–Pb ages and Nd–Sr–Hf isotope geochemistry of the Cretaceous ultramafic-alkaline-(carbonatite) intrusions from the Shillong Plateau, north-eastern India. Lithos, 330, 108-119.
355	360	93.4	26.2	105	105	105		Apatite	Fission-track	-	-	Samchampi	India	Asia	Woolley and Kjarsgaard, 2008
356	361	72.967	18.3									Murud Janjira	India	Asia	None
357	362	81.167	17.483									Kunavaram	India	Asia	None
358	363	79.933	16.067	1242	1242	1242	33	Whole rock	Rb-Sr	-	-	Elchuru	India	Asia	Woolley and Kjarsgaard, 2008
359	364	79.617	15.95									Chintalacheruvu	India	Asia	None
360	365	77.783	12.167	2436	2404	2404	36	whole rock - minerals	Sm-Nd	carbonatite	-	Hogenakal	India	Asia	Kumar, A., Charan, S. N., Gopalan, K., & Macdougall, J. D. (1998). A long-lived enriched mantle source for two Proterozoic carbonatite complexes from Tamil Nadu, southern India. Geochimica et Cosmochimica Acta, 62(3), 515-523.
361	366	78.45	12.467	759	700	700	30	phlogopite	K-Ar	-	-	Samalpatti	India	Asia	①Moralev, V. M., Voronovski, S. N., & Borodin, L. S. (1975). New findings about the age of carbonatites and syenites from southern India. In USSR Acad. Sci (Vol. 222, pp. 46-48). ②Krishnamurthy, P. (2019). Carbonatites of India. Journal of the Geological Society of India, 94(2), 117-138.
362	367	78.533	12.417	770	801	801	10	Whole rock	Pb-Pb	Carbonatite	-	Sevattur	India	Asia	①Woolley and Kjarsgaard, 2008; ②Schleicher, H., Todt, W., Viladkar, S. G., & Schmidt, F. (1997). Pb/Pb age determinations on the Newania and Sevattur carbonatites of India: evidence for multi-stage histories. Chemical Geology, 140(3-4), 261-273.		Average
363	368	78.25	11.683									Salem-Attur (Udaiyapatti)	India	Asia	None
364	369	77.8	11.717	685		771/599	22/16	Phlogopite	K-Ar	Carbonatite		Pakkanadu & Mulakkadu	India	Asia	Woolley and Kjarsgaard, 2008		Average
365	370	77.117	11.033									Ajjipuram	India	Asia	None
366	371	77.167	10.15									Munnar	India	Asia	None
367	372	77.25	9.75		2453	2453	16	Zircon	U-Pb	carbonatite	LA-ICP-MS	Kambammettu (Khambamettu)	India	Asia	Renjith, M. L., Santosh, M., Satyanarayanan, M., Rao, D. S., & Tang, L. (2016). Multiple rifting and alkaline magmatism in southern India during Paleoproterozoic and Neoproterozoic. Tectonophysics, 680, 233-253.
368	373	77.717	8.183									Kudangulam	India	Asia	None
369	374	53.167	24.917									Zirqa Island	Iran	Asia	None
370	375	68.417	53.25	534	534	547-521		-	K-Ar	-	-	Barchinskii	Kazakhstan	Asia	Woolley and Kjarsgaard, 2008		Average	Average
371	376	68.833	53.167	531	531	563-500		-	K-Ar	-	-	Krasnomaiskii	Kazakhstan	Asia	Woolley and Kjarsgaard, 2008		Average	Average
372	377	78.683	41.65	322	322	330-314		-	K-Ar	-	-	Kaichinskii	Kirgystan	Asia	Woolley and Kjarsgaard, 2008		Average	Average
373	378	70.783	39.533									Matchinskii	Kirgystan	Asia	None
374	379	128.017	37.85		232.9	232.9	1.6	Monazite	Pb-Th	Carbonatite	SHRIMP	Hongcheon area	Korea	Asia	Kim N, Cheong A C, Yi K, et al. Post-collisional carbonatite-hosted rare earth element mineralization in the Hongcheon area, central Gyeonggi massif, Korea: Ion microprobe monazite U‐Th‐Pb geochronology and Nd‐Sr isotope geochemistry[J]. Ore Geology Reviews, 2016, 79: 78-87.
375	380	104.167	44.333	139.9	136.6	136.6	2,7	Phlogopite	Ar-Ar	Syenite	-	Mushgai Khudag	Mongolia	Asia	Nikolenko, A.M. et al., 2020. Ar-Ar geochronology and petrogenesis of the Mushgai-Khudag alkaline-carbonatite complex (southern Mongolia). Lithos, 372.
376	381	104.35	44.333	130.6	130.6	130.6	9.3	Whole rock-minerals	Rb-Sr	Syenite	-	Bayan Khoshuu	Mongolia	Asia	Baatar, M., Ochir, G., Kynicky, J., Iizumi, S., Comin-Chiaramonti, P., 2013. Some Notes on the Lugiin Gol, Mushgai Khudag and Bayan Khoshuu Alkaline Complexes, Southern Mongolia. International Journal of Geosciences, 04(08): 1200-1214.
377	382	104.683	44.267									Tsogt Ovoo	Mongolia	Asia	None
378	383	108.217	43.65		152.5	158-147			K-Ar	syenite		Ulgii	Mongolia	Asia	Samoilov and Kovalenko, 1983 V.S. Samoilov, V.I. Kovalenko Complexes of alkaline rocks and carbonatites in Mongolia Nauka, Moscow (1983), p. 195
379	384	105.533	42.983	222.2	222.2	222.2	3.2	Whole rock-minerals	Rb-Sr	Syenite	-	Luugin gol	Mongolia	Asia	Baatar, M., Ochir, G., Kynicky, J., Iizumi, S., Comin-Chiaramonti, P., 2013. Some Notes on the Lugiin Gol, Mushgai Khudag and Bayan Khoshuu Alkaline Complexes, Southern Mongolia. International Journal of Geosciences, 04(08): 1200-1214.
380	385	59.65	21.95	220	154.6	154.6	1.8	Mica	Ar-Ar	Alkaline		Asseel	Oman	Asia	Nasir, S. 2016. Petrology of Late Jurassic allochthonous ultramafic lamprophyres within the Batain Nappes, Northeastern Oman. International Geology Review 58:1-16.	Alternative name: Asseelah
381	386	71.167	34.45									Mohmand Agency	Pakistan	Asia	None
382	387	71.133	34.333		30	30	1.5	apatite	fission-track	carboantite	-	Loe Shilman	Pakistan	Asia	Khattak, N. U., Akram, M., Khan, M. A., & Khan, H. A. (2008). Emplacement time of the Loe–Shilman carbonatite from NW Pakistan: Constraints from fission-track dating. Radiation measurements, 43, S313-S318.
383	388	71.667	34.567									Jawar	Pakistan	Asia	None
384	389	71.7	34.55		29.4	29.4	1.47	Apatite	fission-track	carboantite	-	Silai Patti	Pakistan	Asia	Khattak, N. U., Akram, M., Khan, M. A., & Khan, H. A. (2008). Emplacement time of the Loe–Shilman carbonatite from NW Pakistan: Constraints from fission-track dating. Radiation measurements, 43, S313-S318.
385	390	72.417	34.683									Jambil	Pakistan	Asia	None
386	391	72.517	34.367		297	297	4	-	Rb-Sr	nepheline syenites and ijolite	-	Koga area	Pakistan	Asia	①Le Bas, M. J., Mian, I., & Rex, D. C. (1987). Age and nature of carbonatite emplacement in North Pakistan. Geologische Rundschau, 76(2), 317-323. ②Randive, K., & Meshram, T. (2020). An Overview of the Carbonatites from the Indian Subcontinent. Open Geosciences, 12(1), 85-116.
387	392	72.717	34.117									Tarbela	Pakistan	Asia	None
388	393	32.133	68.717	385	382.3	382.3	5.3	Calcite-Dolomite-Whole rock	Th-Pb	carboantite	ID-TIMS	Seblyavr	Russia	Asia	①Gogol et al., 1998; Rukhlov, A. S., & Bell, K. (2010). Geochronology of carbonatites from the Canadian and Baltic Shields, and the Canadian Cordillera: clues to mantle evolution. Mineralogy and Petrology, 98(1-4), 11-54.
389	394	32.467	68.633		1945	1945	4	Zircon	U-Pb	Carbonatite	-	Gremyakha-Vyrmes	Russia	Asia	Woolley and Kjarsgaard, 2008
390	395	36.117	68.133		377	377	4	phlogopite	Ar-Ar	Nepheline syenite	-	Kontozerskii	Russia	Asia	Arzamastsev, A. A., & Petrovsky, M. N. (2012). Alkaline volcanism in the Kola Peninsula, Russia: Paleozoic Khibiny, Lovozero and Kontozero calderas. Proc. MSTU, 15(2), 277-299.
391	397	37.117	67.067									Pesochnyi	Russia	Asia	None
392	398	33.783	67.717	368	383	383	7	perovskite	U-Pb	Pyroxenite xenoliths	LA-ICP-MS	Khibiny	Russia	Asia	Arzamastsev, A.A. and Wu, F.Y. 2014. U-Pb geochronology and Sr-Nd isotopic systematics of minerals from the ultrabasic-alkaline massifs of the Kola province. Petrology 22:462-479.
393	399	32.95	67.433	372	369.6	369.6	5.3	Biotite-Whole rock	Rb-Sr	Carbonatite	-	Ozernaya Varaka	Russia	Asia	Kramm, U., Kogarko, L.N., Kononova, V.A., and Vartiainen, H., The Kola alkaline province of the CIS and Finland: precise Rb–Sr ages define 380–360 age range for all magmatism, Lithos, 1993, vol. 30, pp. 33–44.
394	400	32.8	67.417	364	377	377	3	schorlomite	U-Pb	Carboantite	LA-ICP-MS	Afrikanda	Russia	Asia	①Ekaterina, B., Salnikova, Anton, R., & Chakhmouradian, et al. (2019). Calcic garnets as a geochronological and petrogenetic tool applicable to a wide variety of rocks. Lithos, 338–339, 141-154. ②Reguir, E. P., Camacho, A., Yang, P., Chakhmouradian, A. R., Kamenetsky, V. S., & Halden, N. M. (2010). Trace-element study and uranium-lead dating of perovskite from the Afrikanda plutonic complex, Kola…
395	401	33.067	67.383		381	381	9	Perovskite	U-Pb	Olivinite	LA-ICP-MS	Lesnaya Varaka	Russia	Asia	Arzamastsev, A.A. and Wu, F.Y. 2014. U-Pb geochronology and Sr-Nd isotopic systematics of minerals from the ultrabasic-alkaline massifs of the Kola province. Petrology 22:462-479.
396	402	33.5	67.3	505	377	377	1	Garnet	U-Pb	Ijolite	ID-TIMS	Salmagorskii (Salmagorsky)	Russia	Asia	①Korobeinikov, A.N.; Mitrofanov, F.P.; Gehor, S.; Laajoki, K.; Pavlov, V.P. and Mamontov, V.P. 1998. Geology and copper sulphide mineralization of the Salmagorskii ring igneous complex, Kola Peninsula, NW Russia. Journal of Petrology 39:2033-2041. ②Stifeeva, M. V., Salnikova, E. B., Arzamastsev, A. A., Kotov, A. B., & Grozdev, V. Y. (2020). Calcic Garnets as a Source of Information on the Age of …	Alternative name: Salmagora, Salmagorsky
397	403	32.3	67.083		368	368	15	Whole rock	K-Ar	Lamprophyre	-	Elovyi Island	Russia	Asia	Beard, A. D., Downes, H., Vetrin, V., Kempton, P. D., & Maluski, H. (1996). Petrogenesis of Devonian lamprophyre and carbonatite minor intrusions, Kandalaksha Gulf (Kola Peninsula, Russia). Lithos, 39(1-2), 93-119.	Alternative name: Elovy Island
398	404	32.267	67.1		385.6	385.6	3.1	Apatite	Th-Pb	Ijolite	TIMS	Kandagubskii	Russia	Asia	Rukhlov, A. S., & Bell, K. (2010). Geochronology of carbonatites from the Canadian and Baltic Shields, and the Canadian Cordillera: clues to mantle evolution. Mineralogy and Petrology, 98(1-4), 11-54.	Alternative name: Kandaguba
399	405	33.383	66.867	475	475	475		Whole rock	K-Ar	Monchiquite and fourchite	-	Kandalakshskii	Russia	Asia	Woolley and Kjarsgaard, 2008		Average	Average
400	406	34.45	66.583	373.1	377	377	3.7	Baddeleyite	U-Pb	Phlogopite-pyroxene phoscorite	TIMS	Turiy Peninsula	Russia	Asia	Rukhlov, A. S., & Bell, K. (2010). Geochronology of carbonatites from the Canadian and Baltic Shields, and the Canadian Cordillera: clues to mantle evolution. Mineralogy and Petrology, 98(1-4), 11-54.
401	407	30.483	67.567	500	365.3	365.3	8	Apatite	Pb-Pb	Sövite	TIMS	Kovdor	Russia	Asia	①Rukhlov, A. S., & Bell, K. (2010). Geochronology of carbonatites from the Canadian and Baltic Shields, and the Canadian Cordillera: clues to mantle evolution. Mineralogy and Petrology, 98(1-4), 11-54. ②Arzamastsev, A.A. and Wu, F.Y. 2014. U-Pb geochronology and Sr-Nd isotopic systematics of minerals from the ultrabasic-alkaline massifs of the Kola province. Petrology 22:462-479.
402	408	29.167	66.95		375	375	2	Garnet	U-Pb	Ijolite	TIMS	Sallanlatvi	Russia	Asia	Stifeeva, M. V., Salnikova, E. B., Arzamastsev, A. A., Kotov, A. B., & Grozdev, V. Y. (2020). Calcic Garnets as a Source of Information on the Age of Ultramafic Alkaline Intrusions in the Kola Magmatic Province. Petrology, 28(1).
403	409	30.117	66.8	391	368	368	3	perovskite	U-Pb	Nepheline pyroxenite	LA-ICP-MS	Vuoriyarvi	Russia	Asia	Arzamastsev, A.A. and Wu, F.Y. 2014. U-Pb geochronology and Sr-Nd isotopic systematics of minerals from the ultrabasic-alkaline massifs of the Kola province. Petrology 22:462-479.
404	410	31.667	66.283		1994.8	1994.8	9.4	Baddeleyite	U-Pb	Carboantite	SHRIMP II	Tiksheozero	Russia	Asia	Rodionov, N. V., Belyatsky, B. V., Antonov, A. V., Simakin, S. G., & Sergeev, S. A. (2015, October). Geochemical features and age of baddeleyite from carbonatites of the Proterozoic Tiksheozero alkaline–ultramafic pluton, North Karelia. In Doklady Earth Sciences (Vol. 464, No. 2, pp. 1039-1043). Pleiades Publishing.
405	411	31.95	66.067	2080	2086	2086	30	Zicon	U-Pb	Syenite	SHRIMP II	Elet’ozerskii	Russia	Asia	Sharkov, E. V., Belyatsky, B. V., Bogina, M. M., Chistyakov, A. V., Shchiptsov, V. V., Antonov, A. V., & Lepekhina, E. N. (2015). Genesis and age of zircon from alkali and mafic rocks of the Elet’ozero Complex, North Karelia. Petrology, 23(3), 259-280.	Alternative name: Elet’ozero
406	412	47.8	67.7	517	517	546-505		Whole rock and phlogopite	K-Ar	Lamprophyre and alkaline picrite	-	Rumyanichnyi	Russia	Asia	Woolley and Kjarsgaard, 2008		Average	Average
407	413	50.5	64.217	612	606	606	10	-	-	-	-	Chetlasskii	Russia	Asia	Chernyshev, I. V., Makeev, A. B., Gols' tsman, Y. V., & Bryanchaninova, N. I. (2010, November). Age of titanium deposits of the northeastern part of the eastern European Platform: Rb--Sr data. In Doklady Earth Sciences (Vol. 435, No. 1, p. 1524). Springer Nature BV.
408	414	60.567	55.983	478	417.3	417.3	2.8	Zicon	U-Pb	carboantite	LA-ICP-MS	Vishnevogorskii (Vishnevye Mountains)	Russia	Asia	Nedosekova, I. L., Belyatsky, B. V., & Belousova, E. A. (2016). Trace elements and Hf isotope composition as indicators of zircon genesis due to the evolution of alkaline-carbonatite magmatic system (Ilmeny-Vishnevogorsky complex, Urals, Russia). Russian Geology and Geophysics, 57(6), 891-906.	Alternative name: Vishnevogorsky
409	415	60.233	55.067	312	428.3	428.3	8.5	Zicon	U-Pb	miaskite	LA-ICP-MS	Ilmenogorskii	Russia	Asia	Nedosekova, I. L., Belyatsky, B. V., & Belousova, E. A. (2016). Trace elements and Hf isotope composition as indicators of zircon genesis due to the evolution of alkaline-carbonatite magmatic system (Ilmeny-Vishnevogorsky complex, Urals, Russia). Russian Geology and Geophysics, 57(6), 891-906.	Alternative name: Ilmenogorsky
410	416	99.35	74.517									Lunnyi	Russia	Asia	None
411	417	101.433	70.95	258	250.2	250.2	0.3	Baddeleyite	U-Pb	carboantite	ID-TIMS	Guli	Russia	Asia	Kamo, S. L., Czamanske, G. K., Amelin, Y., Fedorenko, V. A., Davis, D. W., & Trofimov, V. R. (2003). Rapid eruption of Siberian flood-volcanic rocks and evidence for coincidence with the Permian–Triassic boundary and mass extinction at 251 Ma. Earth and Planetary Science Letters, 214(1-2), 75-91.
412	418	103.167	70.967	218	250	250	1	Garnet	U-Pb	pegmatoid veins	ID-TIMS	Odikhincha	Russia	Asia	Salnikova, E. B., Chakhmouradian, A. R., Stifeeva, M. V., Reguir, E. P., Kotov, A. B., Gritsenko, Y. D., & Nikiforov, A. V. (2019). Calcic garnets as a geochronological and petrogenetic tool applicable to a wide variety of rocks. Lithos, 338, 141-154.
413	419	105.167	71.067									Nemakit & Satellite Plugs	Russia	Asia	None
414	420	103.467	70.717	238	238	238		Phlogopite	K-Ar	-	-	Kugda	Russia	Asia	Woolley and Kjarsgaard, 2008
415	421	100.1	70.2									Changit	Russia	Asia	None
416	422	100.167	70.083									South Satellite of Changit	Russia	Asia	None
417	423	100.267	70.2									West Satellite of Changit	Russia	Asia	None
418	424	102.017	70.317	265		363-167		-	K-Ar	-	-	Dalbykha	Russia	Asia	Woolley and Kjarsgaard, 2008		Average
419	425	102.117	70	220	220	225-215		Biotite	K-Ar	-	-	Bor-Uryakh	Russia	Asia	Woolley and Kjarsgaard, 2008		Average	Average
420	426	105.417	70.25	239	239	245-233		-	K-Ar	-	-	Magan	Russia	Asia	Woolley and Kjarsgaard, 2008		Average	Average
421	427	105.167	70.25									Yraas	Russia	Asia	None
422	428	102.133	68.7									Essei	Russia	Asia	None
423	429	113.067	70.983									Orto-Yrigakhskoe, Tundrovoye and Nomottookhskoe	Russia	Asia	None
424	430	116.583	71		681	681	6	biotite	Ar-Ar	carbonatite breccia	-	Tomtor	Russia	Asia	Vladykin, N. V., Kotov, A. B., Borisenko, A. S., Yarmolyuk, V. V., Pokhilenko, N. P., Sal’nikova, E. B., ... & Yakovleva, S. Z. (2014, January). Age boundaries of formation of the Tomtor alkaline-ultramafic pluton: U-Pb and 40 Ar/39 Ar geochronological studies. In Doklady Earth Sciences (Vol. 454, No. 1, pp. 7-11). Pleiades Publishing.
425	431	116.5	70.85									Chimaara	Russia	Asia	None
426	432	113.167	69.383									Mald’zhangarskii	Russia	Asia	None
427	433	99.283	59.333		231.1	231.1	2.7	Rippite	Ar-Ar	carboantite	-	Chadobetskaya	Russia	Asia	Chebotarev, D. A., Doroshkevich, A. G., Sharygin, V. V., Yudin, D. S., Ponomarchuk, A. V., & Sergeev, S. A. (2017). Geochronology of the Chuktukon carbonatite massif, Chadobets uplift (Krasnoyarsk Territory). Russian Geology and Geophysics, 58(10), 1222-1231.	Alternative name: Chadobets
428	434	94.2	59.283		629.2	629.2	5.9	Phlogopite	Ar-Ar	carboantite	-	Penchenginskii	Russia	Asia	Vernikovskaya, A. E., Datsenko, V. M., Vernikovsky, V. A., Matushkin, N. Y., Laevsky, Y. M., Romanova, I. V., ... & Lepekhina, E. N. (2013, February). Magmatism evolution and carbonatite-granite association in the neoproterozoic active continental margin of the Siberian craton: Thermochronological reconstructions. In Doklady Earth Sciences (Vol. 448, No. 2, pp. 161-167). SP MAIK Nauka/Interperiod…	Alternative name: Penchenga
429	435	91.5	59.233	605		660-550/251		Whole rock	K-Ar	-	-	Kiiskii	Russia	Asia	Woolley and Kjarsgaard, 2008		Average
430	436	88.2	55		509	509	10	-	Sm-Nd	-	-	Petropavlovskii	Russia	Asia	①Vrublevskii, V. A., Gertner, I. F., Makarenko, N. A., & Zhuravlev, D. Z. (2003). The Sm-Nd isotopic age and source of comagmatic alkaline mafic rocks and carbonatites of Kuznetsk Alatau. In Doklady earth sciences (Vol. 391, No. 6, pp. 832-835). Pleiades Publishing, Ltd.(Плеадес Паблишинг, Лтд). ②Vrublevskii, V. V., Krupchatnikov, V. I., Izokh, A. E., & Gertner, I. F. (2012). The alkaline and car…	Alternative name: Upper Petropavlovsk complex
431	437	87.5	50.2	474	506.8	506.8	3.5	phlogopite	Ar-Ar	micaceous clinopyroxenite	-	Edel'veis	Russia	Asia	Vrublevskii, V. V., Krupchatnikov, V. I., Izokh, A. E., & Gertner, I. F. (2012). The alkaline and carbonatitic rocks of Gorny Altai (Edel'veis complex) as indicators of Early Paleozoic plume magmatism in the Central Asian Fold Belt. Russian Geology and Geophysics, 53(8), 721-735.
432	438	100.467	53.633	628	628	628	21					Bolshetagninskii	Russia	Asia	Woolley and Kjarsgaard, 2008	Alternative names: Tagninskii and Tagna
433	439	100.517	53.517	703	645	645	6	phlogopite	Ar-Ar	ankerite carbonatite		Nizhnesayanskii (Beloziminsky, Belaya Zima)	Russia	Asia	Doroshkevich, A. G., Veksler, I. V., Izbrodin, I. A., Ripp, G. S., Khromova, E. A., Posokhov, V. F., ... & Vladykin, N. V. (2016). Stable isotope composition of minerals in the Belaya Zima plutonic complex, Russia: Implications for the sources of the parental magma and metasomatizing fluids. Journal of Asian Earth Sciences, 116, 81-96.
434	440	100.417	53.45									Verkhnesayanskii (Sredneziminsky, Srednyaya Zima)	Russia	Asia	None
435	441	96.533	50.567	404	499	499	39					Kharly	Russia	Asia	Vrublevskii V V, Nikiforov A V, Sugorakova A M, et al. Mantle–Crustal Nature of Early Paleozoic Alkaline Intrusions in Central Sangilen, Tuva (from Nd, Sr, Pb, C, and O Isotope Data)[J]. Russian Geology and Geophysics, 2019, 60(5): 451-462.
436	443	103.033	52.05	680	632	632	2	Zircon	U-Pb	ijolite	-	Zhidoy	Russia	Asia	Yarmolyuk, V. V., Kovalenko, V. I., Sal nikova, E. B., Nikiforov, A. V., Kotov, A. B., & Vladykin, N. V. (2006). Late Riphean rifting and breakup of Laurasia: data on geochronological studies of ultramafic alkaline complexes in the southern framing of the Siberian craton. In DOKLADY EARTH SCIENCES C/C OF DOKLADY-AKADEMIIA NAUK (Vol. 404, No. 7, p. 1031). INTERPERIODICA PUBLISHING.
437	444	104.917	50.667									Torey(Torei)	Russia	Asia	None	Alternative name: Torei, Torey
438	445	107.067	51.933	122	122	122	4	Whole rock	Rb-Sr	Carbonatite	-	Yuzhnoe	Russia	Asia	Woolley and Kjarsgaard, 2008
439	446	107.167	51.85	118	130	130	1	Zircon	U-Pb	carbonatite	SHRIMP II	Khaluta	Russia	Asia	①Ripp, G. S., Doroshkevick, A. G., & Posokhov, V. F. (2009). Age of carbonatite magmatism in Transbaikalia. Petrology, 17(1), 73-89. ②Doroshkevich, A. G., Ripp, G. S., & Moore, K. R. (2010). Genesis of the Khaluta alkaline-basic Ba-Sr carbonatite complex (west Transbaikala, Russia). Mineralogy and Petrology, 98(1-4), 245-268.	Alternative name: Khaluta, Khalyuta
440	447	107.133	51.65	118	126	126	16	Biotite-barite-calcite-bastnaesite	Rb-Sr	carbonatite	-	Arschan（Arshan?）	Russia	Asia	Ripp, G. S., Doroshkevick, A. G., & Posokhov, V. F. (2009). Age of carbonatite magmatism in Transbaikalia. Petrology, 17(1), 73-89.	Alternative name: Arshan
441	448	107.483	51.917	118	126.64	126.64	0.85	Zircon	U-Pb	carbonatite	SHRIMP II	Oshurkovo	Russia	Asia	Ripp, G. S., Doroshkevich, A. G., Posokhov, V. F., Izbrodin, I. A., Konopel’ko, D. L., & Sergeev, S. A. (2011). The age of carbonatites and mafic rocks (SHRIMP II and Rb-Sr dating) from the Oshurkovo apatite-bearing pluton (western Transbaikalia). Russian Geology and Geophysics, 52(5), 517-525.
442	449	112.45	54.117	329		532-282		Nepheline, whole rock, biotite	K-Ar	Theralite, nepheline syenite, nepheline syenite	-	Saizhenskii (Snezhnoe?)	Russia	Asia	Woolley and Kjarsgaard, 2008		Average
443	450	114.5	56.6	593	596	596	3.5	Zircon	U-Pb	carbonatite	SHRIMP II	Vesloe (Veseloe)	Russia	Asia	Ripp, G. S., Doroshkevick, A. G., & Posokhov, V. F. (2009). Age of carbonatite magmatism in Transbaikalia. Petrology, 17(1), 73-89.	Alternative name: Veseloe
444	451	115.083	56.5	624	624	624	3	arfvedsonite	Ar-Ar	carbonatite	-	Pogranichnoe	Russia	Asia	Ripp, G. S., Doroshkevick, A. G., & Posokhov, V. F. (2009). Age of carbonatite magmatism in Transbaikalia. Petrology, 17(1), 73-89.
445	452	119.067	58.4	134	134	134		Phlogopite	K-Ar	Lamproite	-	Malomurunskii	Russia	Asia	Woolley and Kjarsgaard, 2008		Average	Average
446	453	125.3	58.4	1941	1880	1880	13	Zircon	U-Pb	carbonatite	SHRIMP II	Seligdar	Russia	Asia	①Prokopyev, I. R., Doroshkevich, A. G., Ponomarchuk, A. V., & Sergeev, S. A. (2017). Mineralogy, age and genesis of apatite-dolomite ores at the Seligdar apatite deposit (Central Aldan, Russia). Ore Geology Reviews, 81, 296-308. ②Prokopyev, I. R., Doroshkevich, A. G., Sergeev, S. A., Ernst, R. E., Ponomarev, J. D., Redina, A. A., ... & Minakov, A. V. (2019). Petrography, mineralogy and SIMS U-Pb …
447	454	137.5	60.75									Voin	Russia	Asia	None
448	455	137.417	60.683									Gek	Russia	Asia	None
449	456	137.383	60.6									Povorotnyi	Russia	Asia	None
450	457	136.883	59.933	310	350	350		phlogopite	K-Ar	Carbonatite	-	Ozernyi	Russia	Asia	①Woolley and Kjarsgaard, 2008; ②EL'YANOV, A.A. and MORALEV, V.M. 1961. New data on the age of the ultramafic and alkaline rocks of the Aldan shield. Doklady Akademii Nauk SSSR, 141: 687-9.		Average
451	458	136.383	59.75									Khamninskii	Russia	Asia	None
452	459	135.833	58.75	667	654	654	7	Zircon	U-Pb	carbonatite	-	Ingili	Russia	Asia	Yarmolyuk, V. V., Kovalenko, V. I., Sal nikova, E. B., Nikiforov, A. V., Kotov, A. B., & Vladykin, N. V. (2006). Late Riphean rifting and breakup of Laurasia: data on geochronological studies of ultramafic alkaline complexes in the southern framing of the Siberian craton. In DOKLADY EARTH SCIENCES C/C OF DOKLADY-AKADEMIIA NAUK (Vol. 404, No. 7, p. 1031). INTERPERIODICA PUBLISHING.
453	460	131	56.75	700	690	690	28	Phlogopite	K-Ar	carbonatite		Arbarastakh	Russia	Asia	①Woolley and Kjarsgaard, 2008; ②GLAGOLEV, A.A. and KORCHAGIN, A.M. 1974. Alkaline-ultrabasic massifs. Arbarastakh and Inagli. Nauka, Moscow. 176 pp.		Average
454	461	159.567	54.867									Valaginskay Seria	Russia	Asia	None
455	462	134.083	44.5	139	139	145-135		Nepheline	K-Ar	Tinguaite and biotite in pyroxenite	-	Koksharovskii	Russia	Asia	Woolley and Kjarsgaard, 2008		Average	Average
456	463	131.467	43.3		24	24	3	-	K-Ar	Basaltoid	-	Amba volcano	Russia	Asia	Popov, V. K., Maksimov, S. O., Vrzhosek, A. A., & Chubarov, V. M. (2007). Basaltoids and carbonatite tuffs of Ambinsky volcano (Southwestern Primorye): Geology and genesis. Russian Journal of Pacific Geology, 1(4), 371-389.
457	464	80.4	8.167		477.4	477.4	8.7	Rutiles	U-Pb	Carbonatite		Eppawala	Sri Lanka	Asia	Wang, J., Su, B. X., Chen, C., Ferrero, S., Malaviarachchi, S. P., Sakyi, P. A., ... & Dharmapriya, P. L. (2021). Crustal Derivation of the ca. 475 Ma Eppawala Carbonatites in Sri Lanka. Journal of Petrology, 62(11), egab075.
458	465	31.317	39.617	24.2	24.9	24.9	0.5	Phlogopite	K-Ar	Carbonatite	-	Kizilcaören district	Turkey	Asia	Nikiforov, A.V.; Ozturk, H.; Altuncu, S.; and Lebedev, V.A. 2014. Kizilcaoren ore-bearing complex with carbonatites (northwestern Anatolia, Turkey): Formation time and mineralogy of rocks. Geology of Ore Deposits 56:35-60.
459	466	35.517	39.1									Felahiye district	Turkey	Asia	None
460	467	37.633	38.967									Sofular area	Turkey	Asia	None
461	468	56.3	25.533									Uyaynah area	United Arab Emirates	Asia	None
462	469	56.4	25.317									Masfut	United Arab Emirates	Asia	None
463	470	56.067	24.817									Hatta Zone	United Arab Emirates	Asia	None
464	471	66.6	40.233									Chagatai	Uzbekistan	Asia	None
465	472	103.433	22.517		28	28		-	-	-	-	Phong Tho	Vietnam	Asia	Carbonatites in Phong Tho, Lai Chau Province, north–west Vietnam: Their petrogenesis and relationship with Cenozoic potassic alkaline magmatism. The 33rd international geological congress in Oslo (Norway).
466	473	45.933	13.8		840	840			Sr-Nd	Whole rock		Um Sallamiah	Yemen	Asia	Le Bas, M.J.; Ba-Bttat, M.A.O.; Taylor, R.N.; Milton, J.A.; Windley, B.F.; and Evins, P.M. 2004. The carbonatite-marble dykes of Abyan Province, Yemen Republic: the mixing of mantle and crustal carbonate materials revealed by isotope and trace element analysis. Mineral. Petrol. 82:105-135.
467	474	119.167	-21.767		754	754	5	Zirconolite	U-Pb	Dyke swarm	SHRIMP	Mundine Well	Australia	Australasia	Rasmussen, B.; and Fletcher, I.R. 2004. Zirconolite: A new U-Pb chronometer for mafic igneous rocks. Geology 32:785-788.
468	475	116.4	-24.083		1370	1370		Zircon	U-Pb	Ferrocarbonatites, phoscorites, and fenites	LA-ICP-MS	Gifford Creek (includs Lyons River Sills, Yangibana and Frasers)	Australia	Australasia	Slezak, P.; and Spandler, C. 2019. Carbonatites as recorders of mantle-derived magmatism and subsequent tectonic events: An example of the Gifford Creek Carbonatite Complex, Western Australia. Lithos 328:212-227.
469	476	122.333	-28.833	2664	2665	2665	3	Titanite and zircon	U-Pb	-	-	Wallaby	Australia	Australasia	Mueller, A.G.; Hall, G.C.; Nemchin, A.A.; Stein, H.J.; Creaser, R.A.; and Mason, D.R. 2007. Archean high-Mg monzodiorite–syenite, epidote skarn, and biotite–sericite gold lodes in the Granny Smith–Wallaby district, Australia: U–Pb and Re–Os chronometry of two intrusion-related hydrothermal systems. Miner Deposita 43:337.
470	477	122.533	-28.867	2042	2025	2025	10	-	Re-Os	Kimberlite	-	Mt Weld	Australia	Australasia	①Graham, S.; Lambert, D.; and Shee, S. 2004. The petrogenesis of carbonatite, melnoite and kimberlite from the Eastern Goldfields Province, Yilgarn Craton. Lithos 76:519-533. ②Gwalani, L. G., Rogers, K. A., Demény, A., Groves, D. I., Ramsay, R., Beard, A., ... & Eves, A. (2010). The Yungul carbonatite dykes associated with the epithermal fluorite deposit at Speewah, Kimberley, Australia: carbon a…
471	478	123.267	-30.833		2025	2025	10	-	Re-Os	-	-	Cundeelee (Ponton Creek)	Australia	Australasia	Graham, S.; Lambert, D.; and Shee, S. 2004. The petrogenesis of carbonatite, melnoite and kimberlite from the Eastern Goldfields Province, Yilgarn Craton. Lithos 76:519-533.
472	479	127.933	-16.4	1863		≤ ~ 369Ma						Yungul	Australia	Australasia	Downes, P.J.; Dunkley, D.J.; Fletcher, I.R.; McNaughton, N.J.; Rasmussen, B.; Jaques, A.L.; Verrall, M.; and Sweetapple, M.T. 2016. Zirconolite, zircon and monazite-(Ce) U-Th-Pb age constraints on the emplacement, deformation and alteration history of the Cummins Range Carbonatite Complex, Halls Creek Orogen, Kimberley region, Western Australia. Mineral. Petrol. 110:199-222.
473	480	127.65	-17.633		1821	1821	4	Zircon	U-Pb	Syenite	-	Copperhead	Australia	Australasia	Geoscience Australia–Ozchron database
474	481	127.167	-19.283	852	1009	1009	16	Zirconolite	Pb-Pb	Clinopyroxenite	-	Cummins Range	Australia	Australasia	Downes, P.J.; Dunkley, D.J.; Fletcher, I.R.; McNaughton, N.J.; Rasmussen, B.; Jaques, A.L.; Verrall, M.; and Sweetapple, M.T. 2016. Zirconolite, zircon and monazite-(Ce) U-Th-Pb age constraints on the emplacement, deformation and alteration history of the Cummins Range Carbonatite Complex, Halls Creek Orogen, Kimberley region, Western Australia. Mineral. Petrol. 110:199-222.
475	482	134.267	-23.017	733	731	731	0.2	Zircon	U-Pb	carbonatite	LA-ICP-MS	Mud Tank	Australia	Australasia	Gain, S. E., Gréau, Y., Henry, H., Belousova, E., Dainis, I., Griffin, W. L., & O'reilly, S. Y. (2019). Mud Tank Zircon: Long‐term evaluation of a reference material for U‐Pb dating, Hf‐isotope analysis and trace element analysis. Geostandards and Geoanalytical Research, 43(3), 339-354.
476	483	138.583	-32.6									Walloway Diapir	Australia	Australasia	None
477	484	169.35	-44.1	24.3	24.3	24.3		Zircon, sodalite	U-Pb, Rb-Sr	Tinguaite, microsyenite	-	Haast River	New Zealand	Australasia	Woolley and Kjarsgaard, 2008		Average	Average
478	485	23.283	42.933	375		435-315		Galena, apatite and K-feldspar	U-Pb	Syenite	-	Svidnya	Bulgaria	Europe	Woolley and Kjarsgaard, 2008		Average
479	486	14.183	50.683	31.1	31.1	33.1-23.6		Whole rock and mineral	K-Ar	-	-	Roztoky	Czech Republic	Europe	Woolley and Kjarsgaard, 2008		Average	Average
480	487	14.133	50.517									Kostal	Czech Republic	Europe	None
481	488	29.45	67.8	360	380.3	380.3	7.1	calcite and apatite	Th-Pb	silicocarbonatite and sövites	TIMS	Sokli	Finland	Europe	Rukhlov, A. S., & Bell, K. (2010). Geochronology of carbonatites from the Canadian and Baltic Shields, and the Canadian Cordillera: clues to mantle evolution. Mineralogy and Petrology, 98(1-4), 11-54.
482	489	27.75	65.933	2020	2020	2020		Zircon	U-Pb	-	-	Laivajoki	Finland	Europe	Woolley and Kjarsgaard, 2008
483	490	27.65	65.867	1875	2020	2020		Zircon	U–Pb	-	-	Kortejarvi	Finland	Europe	O’Brien H. Introduction to Carbonatite Deposits of Finland[M]//Mineral Deposits of Finland. Elsevier, 2015: 291-303.
484	491	28.85	63.317									Panjavaara	Finland	Europe	①Woodard, J., & Huhma, H. (2015). Paleoproterozoic mantle enrichment beneath the Fennoscandian Shield: Isotopic insight from carbonatites and lamprophyres. Lithos, 236, 311-323. ②Torppa, O. A., & Karhu, J. A. (2007). Ancient subduction recorded in the isotope characteristics of similar to 1.8 Ga Fennoscandian carbonatites. Geochimica et Cosmochimica Acta, 71(15), A1032-A1032. ③Kouvo, O. (1958). R…	Having inferred age	Average
485	492	27.733	63.133	2609	2617.4	2617.4	9.6	Zircon	U–Pb	Apatite sövite	TIMS	Siilinjarvi	Finland	Europe	Rukhlov, A. S., & Bell, K. (2010). Geochronology of carbonatites from the Canadian and Baltic Shields, and the Canadian Cordillera: clues to mantle evolution. Mineralogy and Petrology, 98(1-4), 11-54.
486	493	27.433	61.767	1750	1792	1792	0.9	Zircon	U–Pb	Alvikite	TIMS	Halpanen	Finland	Europe	Rukhlov, A. S., & Bell, K. (2010). Geochronology of carbonatites from the Canadian and Baltic Shields, and the Canadian Cordillera: clues to mantle evolution. Mineralogy and Petrology, 98(1-4), 11-54.
487	494	22.25	60.45		1796	1796	9	Zircon	U–Pb	carbonatite	SIMS	Naantali	Finland	Europe	Woodard, J., & Hetherington, C. J. (2014). Carbonatite in a post-collisional tectonic setting: geochronology and emplacement conditions at Naantali, SW Finland. Precambrian Research, 240, 94-107.
488	495	4.233	44.9	8.5	8.5	8.5	0.2	-	K-Ar	-	-	Chabrieres	France	Europe	Woolley and Kjarsgaard, 2008
489	496	12.2	51.517	89	72	72	1	Baddeleyite	U–Pb	Beforsite	solution	Delitzsch	Germany	Europe	Krüger, J. C., Romer, R. L., & Kämpf, H. (2013). Late Cretaceous ultramafic lamprophyres and carbonatites from the Delitzsch Complex, Germany. Chemical Geology, 353, 140-150.
490	497	7.183	50.4	0	0.017	0.017		Zircon	U-Th	Carbonatite	SIMS	Laacher See (Eifel)	Germany	Europe	Schmitt, A. K., Wetzel, F., Cooper, K. M., Zou, H., & Wörner, G. (2010). Magmatic longevity of Laacher See Volcano (Eifel, Germany) indicated by U–Th dating of intrusive carbonatites. Journal of Petrology, 51(5), 1053-1085.
491	498	6.667	50.25	0.5	0.5	0.631-0.357		-	K-Ar	-	-	Auf Dickel	Germany	Europe	Woolley and Kjarsgaard, 2008		Average	Average
492	499	7.683	48.067	16.4	16.4	16.4		Apatite, whole rock and mineral	Fission track, Rb-Sr	Carbonatite, diatreme breccia	-	Kaiserstuhl （in Upper Rhine Graben）	Germany	Europe	Woolley and Kjarsgaard, 2008		Average	Average
493	500	8.8	47.767	15.7	15.7	15.7		-	K-Ar	-	-	Hegau（in Upper Rhine Graben）	Germany	Europe	Woolley and Kjarsgaard, 2008
494	501	12.267	42.867	0.3	0.3	0.3		-	Ar-Ar	-	-	San Venanzo	Italy	Europe	Woolley and Kjarsgaard, 2008
495	502	12.85	42.6	0.2	0.2	0.2		Phlogopite	Ar-Ar	Carbonatite	-	Polino	Italy	Europe	Woolley and Kjarsgaard, 2008
496	503	12.933	42.417	0.6	0.6	0.6		Kalsilite, phlogopite	Ar-Ar	Lava, pyroclastic rock	-	Cupaello	Italy	Europe	Woolley and Kjarsgaard, 2008
497	504	13.083	42.1	0.5	0.5	0.5		K-feldspar	Ar-Ar	-	-	Oricola	Italy	Europe	Woolley and Kjarsgaard, 2008
498	505	15.633	40.967	0.1	0.1	0.1	0.01	Phlogopite	Ar-Ar	-	-	Monticchio	Italy	Europe	Woolley and Kjarsgaard, 2008
499	506	22.9	70.583	501	574	574	5	Zircon	U-Pb	Carbonatite	ID-TIMS	Sørøy	Norway	Europe	Roberts, R. J., Corfu, F., Torsvik, T. H., Hetherington, C. J., & Ashwal, L. D. (2010). Age of alkaline rocks in the Seiland igneous province, northern Norway.Journal of the Geological Society,167(1), 71-81.	Alternative name: Breivikbotn
500	507	23.167	70.367	483	483	533-470		Nepheline; Zircon	K-Ar; U-Pb	Alkaline nepheline-syenite pegmatites	-	Seiland	Norway	Europe	①Woolley and Kjarsgaard, 2008; ②Pedersen, R. B., Dunning, G. R., & Robins, B. (1989). U-Pb ages of nepheline syenite pegmatites from the Seiland Magmatic Province, N. Norway. In The Caledonides geology of Scandinavia. Conference dedicated to the Memory of Dr Sven Foyn (pp. 3-8).		Average	Average
501	508	22.7	70.283	523	523	523	2	Zircon	U-Pb	Nepheline syenite pegmatite	-	Lillebukt	Norway	Europe	Woolley and Kjarsgaard, 2008
502	509	22.95	70.183									Pollen	Norway	Europe	None
503	510	9.283	59.3	564	564	598-543		Whole rock and mineral, phlogopite, whole rock, biotite and phlogopite	Rb-Sr, Rb-Sr, Pb-Pb, Ar-Ar	-, -, carbonatite and silicate rock, -	-	Fen	Norway	Europe	Woolley and Kjarsgaard, 2008		Average	Average
504	511	22.75	53.767		348	348	15	Zircon	U–Pb	Albitite	SIMS	Tajno	Poland	Europe	Demaiffe, D., Wiszniewska, J., Krzemińska, E., Williams, I. S., Stein, H., Brassinnes, S., ... & Deloule, E. (2013). A hidden alkaline and carbonatite province of early Carboniferous age in northeast Poland: Zircon U-Pb and pyrrhotite Re-Os geochronology. The Journal of Geology, 121(1), 000-000.
505	512	-3.933	38.9	6	6	8.7-1.6		Whole rock	K-Ar	Volcanic rock	-	Calatrava	Spain	Europe	Woolley and Kjarsgaard, 2008		Average	Average
506	513	22.7	65.667	1142	1142	1142	35	Phlogopite	K-Ar	Associated breccia	-	Kalix area	Sweden	Europe	Woolley and Kjarsgaard, 2008
507	514	17.767	62.467	542	542	542	16	Phlogopite	K-Ar	-	-	Avike Bay	Sweden	Europe	Woolley and Kjarsgaard, 2008
508	515	17.5	62.5	553	589.7	589.7	4.4	Baddeleyite	U-Pb	Magnetite-biotite sövite	TIMS	Alno	Sweden	Europe	Rukhlov, A. S., & Bell, K. (2010). Geochronology of carbonatites from the Canadian and Baltic Shields, and the Canadian Cordillera: clues to mantle evolution. Mineralogy and Petrology, 98(1-4), 11-54.
509	516	27.017	49.017	1700	1700	1700		Nepheline and biotite	K-Ar			Proskurovskii	Ukraine	Europe	Woolley and Kjarsgaard, 2008
510	517	28.217	49.267	2060	2060	2060		Zircon	U-Pb			Antonovskii	Ukraine	Europe	Woolley and Kjarsgaard, 2008
511	518	36.25	47.233	1820	2074.4	2074.4	6.3	Zircon	U–Pb	olivinephlogopite alvikite	ID-TIMS	Chernigovskii	Ukraine	Europe	Rukhlov, A. S., & Bell, K. (2010). Geochronology of carbonatites from the Canadian and Baltic Shields, and the Canadian Cordillera: clues to mantle evolution. Mineralogy and Petrology, 98(1-4), 11-54.
512	519	-5.033	57.967	394	429.2	429.2	0.5	Zircon	U–Pb	quartz syenite	ID-TIMS	Borralan	United Kingdom	Europe	Goodenough, K. M., Millar, I., Strachan, R. A., Krabbendam, M., & Evans, J. A. (2011). Timing of regional deformation and development of the Moine Thrust Zone in the Scottish Caledonides: constraints from the U–Pb geochronology of alkaline intrusions. Journal of the Geological Society, 168(1), 99-114.
513	520	-13.983	28.667	27.5	23.2	23.2	0.2	Zircon	U–Pb	Carbonatite	-	Fuerteventura, Esquinzo	Canaries	Oceanic Islands	Cantagrel, J. M., Fuster, J. M., Pin, C., Renaud, U., & Ibarrola, E. (1993). Age miocène inférieur des carbonatites de Fuerteventura (23 Ma: U-Pb zircon) et le magmatisme précoce d'une île océanique (îles Canaries). Comptes rendus de l'Académie des sciences. Série 2, Mécanique, Physique, Chimie, Sciences de l'univers, Sciences de la Terre, 316(8), 1147-1153.		Average
514	521	-14.067	28.367	24.2	22.1	22.1	0.9	Biotite and feldspar, biotite	K-Ar	Carbonatite, carbonatite	-	Fuerteventura, Ajui-Solapa	Canaries	Oceanic Islands	Woolley and Kjarsgaard, 2008		Average
515	522	-24.983	16.85	5.7	5.7	5.7		-	Rb-Sr	-	-	Sao Vicente	Cape Verdes	Oceanic Islands	Woolley and Kjarsgaard, 2008
516	523	-24.7	14.867	1.4	1.4	2.1-0		Biotite, whole rock, whole rock	K-Ar	Sövite, Carbonatite lava flow	-	Brava	Cape Verdes	Oceanic Islands	Woolley and Kjarsgaard, 2008		Average	Average
517	524	-24.5	14.917	4.2	4.2	4.8-3.7		Biotite	K-Ar	Carbonatite	-	Fogo	Cape Verdes	Oceanic Islands	Woolley and Kjarsgaard, 2008		Average	Average
518	525	-23.7	15.1	7.7	7.7	9.8-2.1		Mica, -	K-Ar, Rb-Sr	Carbonatite, -		Sao Tiago	Cape Verdes	Oceanic Islands	Woolley and Kjarsgaard, 2008		Average	Average
519	526	-23.167	15.2	8.9	8.9	11.1-6.8		Whole rock, -	K-Ar, Rb-Sr	Carbonatite, -	-	Maio	Cape Verdes	Oceanic Islands	Woolley and Kjarsgaard, 2008		Average	Average
520	527	69.667	-49.617									Mont Auber de la Rue	Kerguelen	Oceanic Islands	None
521		101.896	28.4086		28	28	0.2	Zircon	U–Pb	syenite	SIMS	Muluozhai	China	Asia	①Ling, X. X., Li, Q. L., Liu, Y., Yang, Y. H., Tang, G. Q., & Li, X. H. (2016). In situ SIMS Th–Pb dating of bastnaesite: constraint on the mineralization time of the Himalayan Mianning–Dechang rare earth element deposits. Journal of Analytical Atomic Spectrometry, 31(8), 1680-1687. ②Hou, Z., Liu, Y., Tian, S., Yang, Z., & Xie, Y. (2015). Formation of carbonatite-related giant rare-earth-element …
522		101.95	27.2		12.7	12.7	0.2	Zircon	U–Pb	syenite	SIMS	Dalucao(Daluxiang)	China	Asia	①Ling, X. X., Li, Q. L., Liu, Y., Yang, Y. H., Tang, G. Q., & Li, X. H. (2016). In situ SIMS Th–Pb dating of bastnaesite: constraint on the mineralization time of the Himalayan Mianning–Dechang rare earth element deposits. Journal of Analytical Atomic Spectrometry, 31(8), 1680-1687. ②Hou, Z., Liu, Y., Tian, S., Yang, Z., & Xie, Y. (2015). Formation of carbonatite-related giant rare-earth-element …
523		101.916	28.2107		28.8	28.8	0.3	Zircon	U–Pb	syenite	SIMS	Lizhuang	China	Asia	①Ling, X. X., Li, Q. L., Liu, Y., Yang, Y. H., Tang, G. Q., & Li, X. H. (2016). In situ SIMS Th–Pb dating of bastnaesite: constraint on the mineralization time of the Himalayan Mianning–Dechang rare earth element deposits. Journal of Analytical Atomic Spectrometry, 31(8), 1680-1687. ②Hou, Z., Liu, Y., Tian, S., Yang, Z., & Xie, Y. (2015). Formation of carbonatite-related giant rare-earth-element …
524		111.836	34.3536		208.4	208.4	3.6	Molybdenite	Re-Os	-	-	Huangshui’an	China	Asia	Cao, J., Ye, H.S., Li, H.Y., Li, Z.Y., Zhang, X.K., He, W., Li, C., 2014. Geological characteristics and molybdenite Re-Os isotopic dating of Huangshui’an carbonatite veintype Mo (Pb) deposit in Songxian County, Henan Province. Miner. Deposits 33, 53–69(in Chinese with English abstract).
525		114.443	40.3525		1765	1765	35	Apatite	U–Pb	carbonatite	LA-ICP-MS	Yousuobao(Huai'an)	China	Asia	①Xu, C., Kynický, J., Song, W., Tao, R., Lü, Z., Li, Y., ... & Fei, Y. (2018). Cold deep subduction recorded by remnants of a Paleoproterozoic carbonated slab. Nature communications, 9(1), 1-8. ②Shao, J. A., Zhang, Y. B., Zhang, L. Q., Mu, B. L., Wang, P. Y., & Guo, F. (2003). Early Mesozoic dike swarms of carbonatites and lamprophyres in Datong area. Acta Petrologica Sinica, 19(1), 93-104.
526		113.667	40.5964		1681	1681	61	Apatite	U–Pb	carbonatite	LA-ICP-MS	Hunyuanyao(Fengzhen)	China	Asia	Xu, C., Kynický, J., Song, W., Tao, R., Lü, Z., Li, Y., ... & Fei, Y. (2018). Cold deep subduction recorded by remnants of a Paleoproterozoic carbonated slab. Nature communications, 9(1), 1-8.
527		82.69	42.31									Tasidouwei	China	Asia	None	Zou, T.R., Xu, J., Chen, W.S., Xiao, F.R., 2002. Rare and rare earth mineral deposits related to alkaline rocks on Northern margin of Tarim Basin, Xinjiang, China. Mineral Deposits, 21(S1):845-848 (in Chinese with English abstract).
528		73.7242	22.2988									Chhaktalo	india	Asia	None	Krishnamurthy, P. (2019). Carbonatites of India. Journal of the Geological Society of India, 94(2), 117-138.
529		73.4089	21.4552									Mahdawa	india	Asia	None	Krishnamurthy, P. (2019). Carbonatites of India. Journal of the Geological Society of India, 94(2), 117-138.
530		72.3698	21.413									Hingoria	india	Asia	None	Krishnamurthy, P. (2019). Carbonatites of India. Journal of the Geological Society of India, 94(2), 117-138.
531		86.301	23.0477									Beldith (Purulia)	india	Asia	None	①Krishnamurthy, P. (2019). Carbonatites of India. Journal of the Geological Society of India, 94(2), 117-138. ②Basu, S. K., & Bhattacharyya, T. (2014). Petrography and mineral chemistry of alkaline-carbonatite complex in Singhbhum crustal province, Purulia region, eastern India. Journal of the Geological society of India, 83(1), 54-70.
532		86.3331	23.0478									Mednitarr	india	Asia	None	Basu, S. K., & Bhattacharyya, T. (2014). Petrography and mineral chemistry of alkaline-carbonatite complex in Singhbhum crustal province, Purulia region, eastern India. Journal of the Geological society of India, 83(1), 54-70.
533		86.5731	22.9947									Kutni	india	Asia	None	Basu, S. K., & Bhattacharyya, T. (2014). Petrography and mineral chemistry of alkaline-carbonatite complex in Singhbhum crustal province, Purulia region, eastern India. Journal of the Geological society of India, 83(1), 54-70.
534		86.5584	22.9959									Dandodih Gamardih	india	Asia	None	Basu, S. K., & Bhattacharyya, T. (2014). Petrography and mineral chemistry of alkaline-carbonatite complex in Singhbhum crustal province, Purulia region, eastern India. Journal of the Geological society of India, 83(1), 54-71.
535		86.6101	22.9786									Chirugora	india	Asia	None	Basu, S. K., & Bhattacharyya, T. (2014). Petrography and mineral chemistry of alkaline-carbonatite complex in Singhbhum crustal province, Purulia region, eastern India. Journal of the Geological society of India, 83(1), 54-72.
536		86.6268	22.9567		922.4	922.4	10.4	Zircon	U-Pb	syenite	SHRIMP II	Sushina	india	Asia	Reddy, S., Clark, C., & Majumdar, R. (2008). Was there a pre-Nunan India IV Antarctica connection. Evidences from SHRIMP U-Pb Zircon. Abstract, the 33rd IGC, Oslo.	Basu, S. K., & Bhattacharyya, T. (2014). Petrography and mineral chemistry of alkaline-carbonatite complex in Singhbhum crustal province, Purulia region, eastern India. Journal of the Geological society of India, 83(1), 54-73.
537		77.5542	14.9524									Khaderpet pipe	india	Asia	None	①Krishnamurthy, P. (2019). Carbonatites of India. Journal of the Geological Society of India, 94(2), 117-138. ②Smith, C. B., Haggerty, S. E., Chatterjee, B., Beard, A., & Townend, R. (2013). Kimberlite, lamproite, ultramafic lamprophyre, and carbonatite relationships on the Dharwar Craton, India; an example from the Khaderpet pipe, a diamondiferous ultramafic with associated carbonatite intrusion…
538		82.5481	24.4702									Chitrangi Region	india	Asia	None	①Krishnamurthy, P. (2019). Carbonatites of India. Journal of the Geological Society of India, 94(2), 117-138. ②Srivastava, R. K. (2013). Petrological and geochemical characteristics of Paleoproterozoic ultramafic lamprophyres and carbonatites from the Chitrangi region, Mahakoshal supracrustal belt, central India. Journal of Earth System Science, 122(3), 759-776.
539		69.1093	23.9438									Pachcham Islands	india	Asia	None	①Krishnamurthy, P. (2019). Carbonatites of India. Journal of the Geological Society of India, 94(2), 117-138. ②Grady, J. C. (1971). Deep main faults in South India. J. Geol. Soc. India, 12, 56-62.
540		77.1263	10.5729									Ariyalur	india	Asia	None	①Krishnamurthy, P. (2019). Carbonatites of India. Journal of the Geological Society of India, 94(2), 117-138. ②Ray, A., Paul, D. K., Sen, G., & Biswas, S. K. (2014). Carbonatite-silicate immiscible melt inclusion in lamprophyre from Kutch, western India: Implication for plume-lithosphere interaction and initiation of Deccan Trap magmatism. EGUGA, 1503.
541		75.54	22.375									Lower Narmada Valley	india	Asia	None	Randive, K., & Meshram, T. (2020). An Overview of the Carbonatites from the Indian Subcontinent. Open Geosciences, 12(1), 85-116.
542		80.625	17.29									Kannegiri Hills	india	Asia	None	Randive, K., & Meshram, T. (2020). An Overview of the Carbonatites from the Indian Subcontinent. Open Geosciences, 12(1), 85-116.
543		79.583	14.8333									Vinjamur	India	Asia	None	Randive, K., & Meshram, T. (2020). An Overview of the Carbonatites from the Indian Subcontinent. Open Geosciences, 12(1), 85-116.
544		83.05	18.25									Bora	India	Asia	None	Randive, K., & Meshram, T. (2020). An Overview of the Carbonatites from the Indian Subcontinent. Open Geosciences, 12(1), 85-116.
545		80.5514	7.64504									Kawisigamuwa	Sri Lanka	Asia	None	①Randive, K., & Meshram, T. (2020). An Overview of the Carbonatites from the Indian Subcontinent. Open Geosciences, 12(1), 85-116. ②Pitawala, H. M. T. G. A. (2019). Mineralogy, petrography, geochemistry and economic potential of carbonate rocks of Sri Lanka. Journal of the Geological Society of Sri Lanka, 20(1).
546		107.696	53.6747		1017.4	1017.4	3.2	magnesioriebeckite	Ar-Ar	alkaline metasomatite	-	Baikal	Russia	Asia	Savelyeva, V. B., Demonterova, E. I., Danilova, Y. V., Bazarova, E. P., Ivanov, A. V., & Kamenetsky, V. S. (2016). New carbonatite complex in the western Baikal area, southern Siberian craton: Mineralogy, age, geochemistry, and petrogenesis. Petrology, 24(3), 271-302.	Alternative name: Western Baikal Area
547		34.9895	67.8115		387	387	7	Zircon	U–Pb	Ultrabasic rocks and alkali syenite	-	Kurga	Russia	Asia	①Arzamastsev, A. A., & Wu, F. Y. (2014). U-Pb geochronology and Sr-Nd isotopic systematics of minerals from the ultrabasic-alkaline massifs of the Kola province. Petrology, 22(5), 462-479. ②Arzamastsev, A. A., Bayanova, T. B., Arzamastseva, L. V., Balashov Yu, D., & Gogol, O. V. (1999). Initial magmatism of Palaeozoic tectono-magmatic activation in the northeastern Baltic Shield: age and geochemi…
548		32.0211	67.4253		379	379	21	Whole rock+Mineral fractions	Rb-Sr	Agpaitic syenite	-	Niva	Russia	Asia	①Arzamastsev, A. A., Glaznev, V. N., Raevsky, A. B., & Arzamastseva, L. V. (2000). Morphology and internal structure of the Kola Alkaline intrusions, NE Fennoscandian Shield: 3D density modelling and geological implications. Journal of Asian Earth Sciences, 18(2), 213-228. ②Arzamastsev, A. A., Belyatsky, B. V., & Arzamastseva, L. V. (2000). Agpaitic magmatism in the northeastern Baltic Shield: a …
549		33.6842	67.131		380	380	5	-	-	-	-	Ingozero	Russia	Asia	Arzamastsev, A. A., & Wu, F. Y. (2014). U-Pb geochronology and Sr-Nd isotopic systematics of minerals from the ultrabasic-alkaline massifs of the Kola province. Petrology, 22(5), 462-479.
550		124.938	58		1906	1906	6					Muostalaah	Russia	Asia	Prokopyev, I. R., Doroshkevich, A. G., Sergeev, S. A., Ernst, R. E., Ponomarev, J. D., Redina, A. A., ... & Minakov, A. V. (2019). Petrography, mineralogy and SIMS U-Pb geochronology of 1.9–1.8 Ga carbonatites and associated alkaline rocks of the Central-Aldan magnesiocarbonatite province (South Yakutia, Russia). Mineralogy and Petrology, 113(3), 329-352.
551		125.333	56.8333			2292 to1764						Birikeen	Russia	Asia	Prokopyev, I. R., Doroshkevich, A. G., Sergeev, S. A., Ernst, R. E., Ponomarev, J. D., Redina, A. A., ... & Minakov, A. V. (2019). Petrography, mineralogy and SIMS U-Pb geochronology of 1.9–1.8 Ga carbonatites and associated alkaline rocks of the Central-Aldan magnesiocarbonatite province (South Yakutia, Russia). Mineralogy and Petrology, 113(3), 329-352.
552		125.908	56.8738		1878	1878	17					Ust-Chulman	Russia	Asia	①Prokopyev, I. R., Doroshkevich, A. G., Sergeev, S. A., Ernst, R. E., Ponomarev, J. D., Redina, A. A., ... & Minakov, A. V. (2019). Petrography, mineralogy and SIMS U-Pb geochronology of 1.9–1.8 Ga carbonatites and associated alkaline rocks of the Central-Aldan magnesiocarbonatite province (South Yakutia, Russia). Mineralogy and Petrology, 113(3), 329-352. ②Khomich, V. G., & Boriskina, N. G. (201…
553		116.583	71		400	400	4	biotite	Ar-Ar	carbonatite	-	Tomtor(2)	Russia	Asia	Vladykin, N. V., Kotov, A. B., Borisenko, A. S., Yarmolyuk, V. V., Pokhilenko, N. P., Sal’nikova, E. B., ... & Yakovleva, S. Z. (2014, January). Age boundaries of formation of the Tomtor alkaline-ultramafic pluton: U-Pb and 40 Ar/39 Ar geochronological studies. In Doklady Earth Sciences (Vol. 454, No. 1, pp. 7-11). Pleiades Publishing.
554		100.407	53.55		583.7	583.7	3.4	-	Ar-Ar	carbonatite dyke	-	Yuzhnaya	Russia	Asia	Ashchepkov, I., Zhmodik, S., Belyanin, D., Kiseleva, O. N., Medvedev, N., Travin, A., ... & Downes, H. (2020). Aillikites and Alkali Ultramafic Lamprophyres of the Beloziminsky Alkaline Ultrabasic-Carbonatite Massif: Possible Origin and Relations with Ore Deposits. Minerals, 10(5), 404.
555		-119.115	52.382		340.9	340.9	5.8	Zircon	U–Pb	carbonatite	LA-ICP-MS	Serpentine Creek	Canada	America North	Millonig, L. J., Gerdes, A., & Groat, L. A. (2012). U–Th–Pb geochronology of meta-carbonatites and meta-alkaline rocks in the southern Canadian Cordillera: a geodynamic perspective. Lithos, 152, 202-217.
556		-118.96	52.163		497.6	497.6	2	Zircon	U–Pb	carbonatite	LA-ICP-MS	Felix	Canada	America North	Millonig, L. J., Gerdes, A., & Groat, L. A. (2012). U–Th–Pb geochronology of meta-carbonatites and meta-alkaline rocks in the southern Canadian Cordillera: a geodynamic perspective. Lithos, 152, 202-217.
557		-119	52.378		489.7	489.7	8.4	Zircon	U–Pb	carbonatite	LA-ICP-MS	Little Chicago	Canada	America North	Millonig, L. J., Gerdes, A., & Groat, L. A. (2012). U–Th–Pb geochronology of meta-carbonatites and meta-alkaline rocks in the southern Canadian Cordillera: a geodynamic perspective. Lithos, 152, 202-217.
558		-118.732	51.344		704	704	88	Zircon	U–Pb	carbonatite	LA-ICP-MS	Ratchford Creek	Canada	America North	Millonig, L. J., Gerdes, A., & Groat, L. A. (2012). U–Th–Pb geochronology of meta-carbonatites and meta-alkaline rocks in the southern Canadian Cordillera: a geodynamic perspective. Lithos, 152, 202-218.
559		-42.025	63.24		2664	2664	4/-2	Zircon	U-Pb	carbonatite		Singertat	Greenland	America North	JANNE BLICHERT-TOFT, MINIK T. ROSING, CHARLES E. LESHER, CATHERINE CHAUVEL, Geochemical Constraints on the Origin of the Late Archean Skjoldungen Alkaline Igneous Province, SE Greenland, Journal of Petrology, Volume 36, Issue 2, April 1995, Pages 515–561,
560		-56.99	-25.7									Sapucai	Paraguay	America South	None	①Speziale, S., Castorina, F., Censi, P., de Barros Gomes, C., Marques, L. S., & Comin-Chiaramonti, P. (2020). Carbonatites from the Southern Brazilian platform: I. Open Geosciences, 12(1), 452-478. ②Gomes, C. D. B., Comin-Chiaramonti, P., Azzone, R. G., Ruberti, E., & Rojas, G. E. E. (2018). Cretaceous carbonatites of the southeastern Brazilian Platform: a review. Brazilian Journal of Geology, 48…
561		-57.96	-22.17		138.7	138.7	0.2	Biotite	Ar-Ar	basanite	-	Valle-mí	Paraguay	America South	①Comin-Chiaramonti, P., Marzoli, A., de Barros Gomes, C., Milan, A., Riccomini, C., Velázquez, V. F., ... & Vasconcelos, P. M. (2007). The origin of post-Paleozoic magmatism in eastern Paraguay. SPECIAL PAPERS-GEOLOGICAL SOCIETY OF AMERICA, 430, 603. ②Speziale, S., Castorina, F., Censi, P., de Barros Gomes, C., Marques, L. S., & Comin-Chiaramonti, P. (2020). Carbonatites from the Southern Brazili…
562		-56.95	-25.71									Cerro Canãda	Paraguay	America South	None	Speziale, S., Castorina, F., Censi, P., de Barros Gomes, C., Marques, L. S., & Comin-Chiaramonti, P. (2020). Carbonatites from the Southern Brazilian platform: I. Open Geosciences, 12(1), 452-478.
563		-56.78	-25.41									Cerro E Santa Elena	Paraguay	America South	None	Speziale, S., Castorina, F., Censi, P., de Barros Gomes, C., Marques, L. S., & Comin-Chiaramonti, P. (2020). Carbonatites from the Southern Brazilian platform: I. Open Geosciences, 12(1), 452-478.
564		-58.2916	-20.0255									Cerro Guazu	Paraguay	America South	None	Cerva-Alves, T., Remus, M. V. D., Dani, N., & Basei, M. A. S. (2017). Integrated field, mineralogical and geochemical characteristics of Caçapava do Sul alvikite and beforsite intrusions: A new Ediacaran carbonatite complex in southernmost Brazil. Ore Geology Reviews, 88, 352-369.
565		-54.2218	-30.8915									Santa Clara	Brazil	America South	None	Monteiro, C. F., de Oliveira, Í. L., Brod, J. A., Dantas, E. L., de Araujo, C. E. G., Zacchi, É. N. P., & Fuck, R. A. (2020). Nd-Sr-Hf isotopes and U-Pb ages of mesoproterozoic Três Estradas Alkaline-Carbonatite Complex, Brazil: Implications for Sul-Riograndense Shield evolution and rodinia break-up. Precambrian Research, 351, 105963.
566		-53.4339	-30.6435									Passo Feio (Located in Caçapava do Sul)	Brazil	America South	None	Cerva-Alves, T., Remus, M. V. D., Dani, N., & Basei, M. A. S. (2017). Integrated field, mineralogical and geochemical characteristics of Caçapava do Sul alvikite and beforsite intrusions: A new Ediacaran carbonatite complex in southernmost Brazil. Ore Geology Reviews, 88, 352-369.
567		-53.4241	-30.5137		603.2	603.2	4.5	Zircon	U-Pb	beforsite of carbonatite	LA-ICP-MS	Picada dos Tocos (also called Mato Grande, Located in Caçapava do Sul)	Brazil	America South	①Cerva-Alves, T., Remus, M. V. D., Dani, N., & Basei, M. A. S. (2017). Integrated field, mineralogical and geochemical characteristics of Caçapava do Sul alvikite and beforsite intrusions: A new Ediacaran carbonatite complex in southernmost Brazil. Ore Geology Reviews, 88, 352-369. ②Monteiro, C. F., de Oliveira, Í. L., Brod, J. A., Dantas, E. L., de Araujo, C. E. G., Zacchi, É. N. P., & Fuck, R. …
568		-53.7879	-30.996									Joca Tavares	Brazil	America South	None	Cerva-Alves, T., Remus, M. V. D., Dani, N., & Basei, M. A. S. (2017). Integrated field, mineralogical and geochemical characteristics of Caçapava do Sul alvikite and beforsite intrusions: A new Ediacaran carbonatite complex in southernmost Brazil. Ore Geology Reviews, 88, 352-369.
569		-53.8298	-31.0216									Porteira	Brazil	America South	None	Monteiro, C. F., de Oliveira, Í. L., Brod, J. A., Dantas, E. L., de Araujo, C. E. G., Zacchi, É. N. P., & Fuck, R. A. (2020). Nd-Sr-Hf isotopes and U-Pb ages of mesoproterozoic Três Estradas Alkaline-Carbonatite Complex, Brazil: Implications for Sul-Riograndense Shield evolution and rodinia break-up. Precambrian Research, 351, 105963.
570		-53.8035	-30.9928									Santa Inˆes	Brazil	America South	None	Monteiro, C. F., de Oliveira, Í. L., Brod, J. A., Dantas, E. L., de Araujo, C. E. G., Zacchi, É. N. P., & Fuck, R. A. (2020). Nd-Sr-Hf isotopes and U-Pb ages of mesoproterozoic Três Estradas Alkaline-Carbonatite Complex, Brazil: Implications for Sul-Riograndense Shield evolution and rodinia break-up. Precambrian Research, 351, 105963.
571		-54.1926	-30.9103		1110	1110	4.8	Zircon	U-Pb	dolomite metacarbonatite	LA-MC-ICP-MS	Trˆes Estradas	Brazil	America South	①Monteiro, C. F., de Oliveira, Í. L., Brod, J. A., Dantas, E. L., de Araujo, C. E. G., Zacchi, É. N. P., & Fuck, R. A. (2020). Nd-Sr-Hf isotopes and U-Pb ages of mesoproterozoic Três Estradas Alkaline-Carbonatite Complex, Brazil: Implications for Sul-Riograndense Shield evolution and rodinia break-up. Precambrian Research, 351, 105963. ②Anzolin, H. D. M., Dani, N., Remus, M. V. D., Ribeiro, R. D.…
572		-55.0221	-13.9122									Planalto da Serra	Brazil	America South	None	Monteiro, C. F., de Oliveira, Í. L., Brod, J. A., Dantas, E. L., de Araujo, C. E. G., Zacchi, É. N. P., & Fuck, R. A. (2020). Nd-Sr-Hf isotopes and U-Pb ages of mesoproterozoic Três Estradas Alkaline-Carbonatite Complex, Brazil: Implications for Sul-Riograndense Shield evolution and rodinia break-up. Precambrian Research, 351, 105963.
573		-47.5994	-21.8934									Pocos de Caldas	Brazil	America South	None	Monteiro, C. F., de Oliveira, Í. L., Brod, J. A., Dantas, E. L., de Araujo, C. E. G., Zacchi, É. N. P., & Fuck, R. A. (2020). Nd-Sr-Hf isotopes and U-Pb ages of mesoproterozoic Três Estradas Alkaline-Carbonatite Complex, Brazil: Implications for Sul-Riograndense Shield evolution and rodinia break-up. Precambrian Research, 351, 105963.
574		-51.5758	-15.6228									Santa Fe	Brazil	America South	None	Cerva-Alves, T., Remus, M. V. D., Dani, N., & Basei, M. A. S. (2017). Integrated field, mineralogical and geochemical characteristics of Caçapava do Sul alvikite and beforsite intrusions: A new Ediacaran carbonatite complex in southernmost Brazil. Ore Geology Reviews, 88, 352-369.
575		-51.3549	-15.7899									Agua Branca	Brazil	America South	None	Cerva-Alves, T., Remus, M. V. D., Dani, N., & Basei, M. A. S. (2017). Integrated field, mineralogical and geochemical characteristics of Caçapava do Sul alvikite and beforsite intrusions: A new Ediacaran carbonatite complex in southernmost Brazil. Ore Geology Reviews, 88, 352-369.
576		-47.09	-23.099									Piedade	Brazil	America South	None	Gomes, C. D. B., Comin-Chiaramonti, P., Azzone, R. G., Ruberti, E., & Rojas, G. E. E. (2018). Cretaceous carbonatites of the southeastern Brazilian Platform: a review. Brazilian Journal of Geology, 48(2), 317-345.
577		21.189	62.785									Korsnas	Finland	Europe	None	Al-Ani, T., Molnár, F., Lintinen, P., & Leinonen, S. (2018). Geology and mineralogy of rare earth elements deposits and occurrences in Finland. Minerals, 8(8), 356.
578		27.693	65.91		2020	2020		Zircon	U–Pb	-	-	Petäikkö-Suvantovaara	Finland	Europe	O’Brien, H. (2015). Introduction to Carbonatite Deposits of Finland. In Mineral Deposits of Finland (pp. 291-303). Elsevier.
579		12.0481	42.066		0.2	0.2	0.02		K-Ar	leucitite	-	Pianciano	Italy	Europe	Stoppa, F., Schiazza, M., Rosatelli, G., Castorina, F., Sharygin, V. V., Ambrosio, F. A., & Vicentini, N. (2019). Italian carbonatite system: From mantle to ore-deposit. Ore Geology Reviews, 114, 103041.
580		12.4058	42.1354		0.214	0.214	0.01		K-Ar	leucitite	-	Ficoreto	Italy	Europe	Stoppa, F., Schiazza, M., Rosatelli, G., Castorina, F., Sharygin, V. V., Ambrosio, F. A., & Vicentini, N. (2019). Italian carbonatite system: From mantle to ore-deposit. Ore Geology Reviews, 114, 103041.
581		11.9865	42.5361		0.25	0.25	0.03		Ar-Ar	Melilite leucitite	-	Forcinelle	Italy	Europe	①Brocchini, D., Di Battistini, G., Laurenzi, M. A., Vernia, L., & Bargossi, G. M. (2000). New 40 Ar/39 Ar datings on the southeastern sector of the Vulsinian volcanic district (central Italy). Bollettino della Società Geologica Italiana, 119(1), 113-120. ②Stoppa, F., Schiazza, M., Rosatelli, G., Castorina, F., Sharygin, V. V., Ambrosio, F. A., & Vicentini, N. (2019). Italian carbonatite system: F…
582		-10.058	51.602		305.66	314.44-296.88		phlogopite	Ar-Ar	lamprophric pipe and post-orogenic dyke	-	Cahermore	Ireland	Europe	Brady, A., & Moore, K. (2012). A mantle-derived dolomite silicocarbonatite from the southwest coast of Ireland. Mineralogical Magazine, 76(2), 357-376. doi:10.1180/minmag.2012.076.2.06
583		53.553	42.345		16	16		-	-	-	-	"URG"	Germany	Europe	Banks, G. J., Walter, B. F., Marks, M. A., & Siegfried, P. R. (2019). A Workflow to Define, Map and Name a Carbonatite-or Alkaline Igneous-Associated REE-HFSE Mineral System: A Case Study from SW Germany. Minerals, 9(2), 97.
584		52.826	41.0749			117-18		-	-	-	-	Bonndorf garben	Germany	Europe	Banks, G. J., Walter, B. F., Marks, M. A., & Siegfried, P. R. (2019). A Workflow to Define, Map and Name a Carbonatite-or Alkaline Igneous-Associated REE-HFSE Mineral System: A Case Study from SW Germany. Minerals, 9(2), 97.
585		28.43	65.13		2741	2741	2	Zircon	U-Pb	quartz alkali feldspar syenite	TIMS	Likamännikkö	Finland	Europe	Perttu, Mikkola, and, Paula, Salminen, & and, et al. (2011). The 2.74 ga likamännikkö complex in suomussalmi, east finland: lost between sanukitoids and truly alkaline rocks?. Lithos.
586		35.765	-4.217									Gallapo	Tanzania	Africa	None	Boniface, N. (2017). Crystal chemistry of pyrochlore from the Mesozoic Panda Hill carbonatite deposit, western Tanzania. Journal of African Earth Sciences, 126, 33-44.
587		33.011	-8.914		101	101	12	Biotite	K-Ar	-	-	Musensi	Tanzania	Africa	①Boniface, N. (2017). Crystal chemistry of pyrochlore from the Mesozoic Panda Hill carbonatite deposit, western Tanzania. Journal of African Earth Sciences, 126, 33-46. ②Meert, J. G., van der Voo, R., & Ayub, S. (1995). Paleomagnetic investigation of the Neoproterozoic Gagwe lavas and Mbozi complex, Tanzania and the assembly of Gondwana. Precambrian Research, 74(4), 225-244.
588		32.75	-9.12		743	743	30	Biotite	K-Ar	syenitic rocks	-	Mbozi	Tanzania	Africa	①Boniface, N. (2017). Crystal chemistry of pyrochlore from the Mesozoic Panda Hill carbonatite deposit, western Tanzania. Journal of African Earth Sciences, 126, 33-46. ②Meert, J. G., van der Voo, R., & Ayub, S. (1995). Paleomagnetic investigation of the Neoproterozoic Gagwe lavas and Mbozi complex, Tanzania and the assembly of Gondwana. Precambrian Research, 74(4), 225-244.
589		30.55	-6.81									Kampemba Hill	Tanzania	Africa	None	Boniface, N. (2017). Crystal chemistry of pyrochlore from the Mesozoic Panda Hill carbonatite deposit, western Tanzania. Journal of African Earth Sciences, 126, 33-44.
590		-16.03	22.28		104	104	4	Zircon	U-Pb	carbonatite	SHRIMP	Twihinat	Morocco	Africa	①Benaouda, R. , Kraemer, D. , Sitnikova, M. , Goldmann, S. , & Bau, M. . (2020). Discovery of high-grade ree-nb-fe mineralization associated with calciocarbonatite in south morocco. Ore Geology Reviews, 124, 103631.②Montero, P. , Haissen, F. , Mouttaqi, A. , Molina, J. F. , Errami, A. , & Sadki, O. , et al. (2016). Contrasting shrimp u–pb zircon ages of two carbonatite complexes from the peri-cra…
591		-14.83	22.15		1850	1850	30	Zircon	U-Pb	carbonatite	SHRIMP	Gleibat Lafhouda	Morocco	Africa	①Benaouda, R. , Kraemer, D. , Sitnikova, M. , Goldmann, S. , & Bau, M. . (2020). Discovery of high-grade ree-nb-fe mineralization associated with calciocarbonatite in south morocco. Ore Geology Reviews, 124, 103631.②Montero, P. , Haissen, F. , Mouttaqi, A. , Molina, J. F. , Errami, A. , & Sadki, O. , et al. (2016). Contrasting shrimp u–pb zircon ages of two carbonatite complexes from the peri-cra…
592		-15.993	22.517									Lamlaga	Morocco	Africa	None	Benaouda, R. , Kraemer, D. , Sitnikova, M. , Goldmann, S. , & Bau, M. . (2020). Discovery of high-grade ree-nb-fe mineralization associated with calciocarbonatite in south morocco. Ore Geology Reviews, 124, 103631.
593		-15	23.22									Aghracha	Morocco	Africa	None	Benaouda, R. , Kraemer, D. , Sitnikova, M. , Goldmann, S. , & Bau, M. . (2020). Discovery of high-grade ree-nb-fe mineralization associated with calciocarbonatite in south morocco. Ore Geology Reviews, 124, 103631.
594		16.62	-24.97									São Nicolau	Cape Verdes	Oceanic Islands	None	de Ignacio, C., Muñoz, M., & Sagredo, J. (2012). Carbonatites and associated nephelinites from São Vicente, Cape Verde Islands. Mineralogical magazine, 76(2), 311-355.

## Sheet: G50775
Liu, S.-L., et al., 2023, Trends and rhythms in carbonatites and kimberlites reflect thermo-tectonic evolution of Earth: Geology, v. 51, https://doi.org/10.1130/G50775.1
